# Supplementary material for: Interspecific variation in tropical tree height and crown allometries in relation to life history traits
Source: Copernicus journal article supplement (doi:10.5194/bg-2018-314), 2018-07-12
Supplement: Supplementary file 1 [file bg-2018-314-supplement.pdf]

**Supplementary Material - Interspecific variation in tropical tree height and crown allometries in relation to life history traits**

Isabel Martinez<sup>1\*</sup>, Helene C. Muller-Landau<sup>2</sup>, S. Joseph Wright<sup>2</sup>, Stephanie A. Bohlman<sup>2,3</sup> and Stephen W. Pacala<sup>1</sup>

1. Department of Ecology and Evolutionary Biology, Princeton University, Princeton, NJ 08544, USA
2. Smithsonian Tropical Research Institute, Box 0843-03092, Balboa, Ancón, Panama
3. School of Forest Resources and Conservation, University of Florida, Gainesville, Florida 32601, USA

\*E-mail: [isamcano@gmail.com](mailto:isamcano@gmail.com)

**Table S1.** Sources of field measurement data for tree heights and crown dimensions, methods, site of measurement and the number of data points. Where crown areas were not measured directly, they were estimated as pi times the geometric mean crown radius.

| Source          | Crown method                                             | Height method                                                | Site    | Years     | N Crowns | N Heights | Observers                                          | Reference              |
|-----------------|----------------------------------------------------------|--------------------------------------------------------------|---------|-----------|----------|-----------|----------------------------------------------------|------------------------|
| 1 O'Brien       | 8 radii <sup>1</sup>                                     | Telescoping pole <sup>2</sup> or tangent method <sup>3</sup> | BCI     | 1993      | 171      | 171       | S. O'Brien                                         | O'Brien et al. 1995    |
| 2 Spiro         | 8 radii <sup>1</sup>                                     | Telescoping pole <sup>2</sup> or tangent method <sup>3</sup> | BCI     | 1993      | 195      | 194       | Spiro                                              | Bohlman & O'Brien 2006 |
| 3 Thomas        | –                                                        | Telescoping pole <sup>2</sup> or tangent method <sup>3</sup> | BCI     | 2000      | –        | 43        | Thomas                                             | Thomas (unpubl data)   |
| 4 Bohlman       | 8 radii <sup>1</sup>                                     | Sine method <sup>4</sup>                                     | BCI     | 1997      | 175      | 182       | S. A. Bohlman                                      | Bohlman & O'Brien 2006 |
| 5 Wright        | 8 radii <sup>1</sup>                                     | Telescoping pole <sup>2</sup> or tangent method <sup>3</sup> | BCI     | 2007      | 760      | 824       | M. C. Ruiz-Jaen & C. Salvador                      | Wright et al. 2010     |
| 6 Wright        | –                                                        | Telescoping pole <sup>2</sup> or tangent method <sup>3</sup> | Gigante | 1998-1999 | –        | 4720      | A. Peterson, C. Korine, O. Hernandez & R. Gonzalez | NA                     |
| 7 Muller-Landau | Longest diameter and perpendicular diameter <sup>5</sup> | Telescoping pole <sup>2</sup>                                | BCI     | 1996-1999 | 505      | 1019      | H. Muller-Landau                                   | NA                     |
| 8 Muller-Landau | –                                                        | Telescoping pole <sup>2</sup> or sine method <sup>4</sup>    | BCI     |           | –        | 2113      | P. Ramos, P. Villareal                             | NA                     |
| 9 Muller-Landau | Photogrammetry <sup>6</sup>                              | Photogrammetry minus lidar DEM <sup>7</sup>                  | BCI     | 2014      | 619      | 619       | J. Dandois                                         | NA                     |
| <i>Total</i>    |                                                          |                                                              |         |           | 2425     | 9885      |                                                    |                        |

<sup>1</sup> The horizontal distance from the trunk to the vertical projection of the edge of the canopy was measured in eight compass directions 45 degrees apart, including magnetic north.

<sup>2</sup> These measurements were all on small saplings. The horizontal distance spanning the longest dimension of the crown was measured together with the perpendicular horizontal dimension of the crown.

<sup>3</sup> Height measurements were made with a height-marked telescoping pole for individuals that could be reached by this pole (typically to 5 or 8 m height).

<sup>4</sup> Height estimates for trees too large to be measured with a telescoping pole were based on combining measurements of the angle to the top of the tree and the distance to the base of the tree. In early studies, the distance to the base of the tree was measured manually; in later studies, with a laser rangefinder.

<sup>5</sup> Height measurements too large to be measured with a telescoping pole were based on measurements of the vertical distance to the highest leaf as measured with a laser rangefinder. See Larjavaara & Muller-Landau (2013) for details.

<sup>6</sup> Overlapping aerial photos taken by an unmanned aerial vehicle in October 2014 were processed using Agisoft Photoscan to obtain a 3D point cloud, from which orthomosaics and canopy surface elevation maps were produced at a resolution of 7 cm. The orthomosaic and canopy surface maps were georeferenced by comparison with 2009 1-m resolution airborne lidar data. Individual tree crowns greater than 50 m<sup>2</sup> in area were manually delineated, and were assigned to tagged trees in the 50 ha forest dynamics plot through ground-based field work that also assessed whether they were fully sun-exposed. Crown area was estimated as the area of the delineated crown, including only fully sun-exposed individuals.

<sup>7</sup> A 1-m ground digital elevation model from airborne lidar (2009) was subtracted from the canopy surface elevation calculated from the aerial photos as above to obtain a map of canopy height across the 50 ha plot. For each delineated crown linked to a tagged, fully sun-exposed tree, tree height was assessed as the maximum canopy height within the delineated crown area.

**Table S2.** Posterior, species-level parameter estimates (median and 90% posterior interval) of the best allometric models for predicting tree height (m) and crown area (m<sup>2</sup>) from trunk diameter (cm) (Table 1). The standard error,  $\sigma_v$ , of the best models was 0.181 (0.179, 0.183) and 0.549 (0.536, 0.563) for tree height and crown area, respectively. Michaelis-Menten (gMM) used for tree height and power law used for crown area. Note that table gives raw parameter estimates (*i.e.* see equations 3 and 2 in the main text for tree height and crown area, respectively).

| Species                          | Tree height       |                   |                   | Crown area           |                   |
|----------------------------------|-------------------|-------------------|-------------------|----------------------|-------------------|
|                                  | a                 | b                 | k                 | a                    | b                 |
| <i>Adelia triloba</i>            | 57.1 (48.1, 67.9) | 0.66 (0.55, 0.77) | 23.2 (17.7, 29.1) | 0.800 (0.371, 1.783) | 1.34 (1.07, 1.60) |
| <i>Alchornea costaricensis</i>   | 53.0 (44.4, 63.3) | 0.64 (0.57, 0.72) | 18.8 (15.0, 23.2) | 0.553 (0.255, 1.203) | 1.33 (1.11, 1.55) |
| <i>Allophylus psilospermus</i>   | 57.9 (48.9, 69.0) | 0.74 (0.63, 0.85) | 22.0 (16.6, 28.0) | 0.660 (0.302, 1.415) | 1.35 (1.10, 1.62) |
| <i>Alseis blackiana</i>          | 56.2 (48.6, 65.0) | 0.73 (0.71, 0.77) | 21.7 (18.8, 25.0) | 0.228 (0.195, 0.265) | 1.49 (1.42, 1.54) |
| <i>Amaioua corymbosa</i>         | 63.0 (53.0, 75.3) | 0.70 (0.62, 0.77) | 20.7 (16.9, 25.3) | 0.721 (0.378, 1.452) | 1.30 (1.04, 1.53) |
| <i>Anacardium excelsum</i>       | 48.5 (42.8, 56.3) | 0.82 (0.70, 0.95) | 17.6 (11.1, 24.3) | 0.611 (0.262, 1.387) | 1.32 (1.15, 1.50) |
| <i>Andira inermis</i>            | 63.5 (53.6, 75.5) | 0.74 (0.64, 0.84) | 24.6 (18.7, 31.0) | 0.444 (0.187, 1.051) | 1.38 (1.12, 1.64) |
| <i>Annona acuminata</i>          | 62.2 (52.1, 74.5) | 0.72 (0.59, 0.84) | 23.5 (18.0, 29.4) | 0.669 (0.364, 1.258) | 1.32 (1.08, 1.55) |
| <i>Apeiba membranacea</i>        | 53.9 (46.2, 62.9) | 0.71 (0.65, 0.78) | 18.5 (15.6, 21.6) | 0.997 (0.454, 2.338) | 1.15 (0.95, 1.34) |
| <i>Apeiba tibourbou</i>          | 42.5 (34.5, 52.3) | 0.78 (0.65, 0.90) | 18.7 (12.9, 25.3) | 0.562 (0.239, 1.299) | 1.34 (1.09, 1.59) |
| <i>Ardisia fendleri</i>          | 62.3 (52.3, 74.2) | 0.62 (0.53, 0.72) | 22.4 (17.9, 27.3) | 0.737 (0.380, 1.415) | 1.32 (1.07, 1.55) |
| <i>Aspidosperma spruceanum</i>   | 62.5 (54.6, 72.4) | 0.77 (0.72, 0.82) | 19.6 (17.2, 22.5) | 0.692 (0.328, 1.515) | 1.24 (1.05, 1.42) |
| <i>Astronium graveolens</i>      | 63.9 (55.3, 74.9) | 0.79 (0.72, 0.85) | 23.7 (19.8, 28.1) | 0.578 (0.234, 1.282) | 1.30 (1.09, 1.53) |
| <i>Beilschmiedia pendula</i>     | 52.4 (47.2, 58.4) | 0.91 (0.88, 0.95) | 26.9 (24.2, 30.1) | 0.583 (0.500, 0.677) | 1.27 (1.21, 1.33) |
| <i>Brosimum alicastrum</i>       | 63.2 (56.4, 71.2) | 0.80 (0.77, 0.84) | 29.4 (26.5, 32.9) | 0.939 (0.795, 1.116) | 1.28 (1.22, 1.33) |
| <i>Brosimum quianense</i>        | 62.0 (52.5, 73.6) | 0.71 (0.64, 0.78) | 19.6 (16.2, 23.5) | 0.790 (0.458, 1.364) | 1.30 (1.10, 1.51) |
| <i>Calophyllum longifolium</i>   | 61.1 (53.3, 71.0) | 0.74 (0.69, 0.79) | 20.7 (17.8, 24.1) | 0.495 (0.267, 0.911) | 1.37 (1.22, 1.52) |
| <i>Casearia aculeata</i>         | 61.7 (52.1, 73.4) | 0.74 (0.63, 0.85) | 23.1 (17.6, 29.0) | 0.603 (0.302, 1.189) | 1.34 (1.09, 1.57) |
| <i>Casearia arborea</i>          | 56.4 (47.1, 68.3) | 0.67 (0.59, 0.76) | 17.3 (13.5, 21.9) | 0.624 (0.262, 1.473) | 1.29 (1.06, 1.53) |
| <i>Casearia sylvestris</i>       | 57.7 (48.4, 68.4) | 0.69 (0.58, 0.79) | 22.6 (16.7, 28.9) | 0.594 (0.262, 1.389) | 1.34 (1.10, 1.60) |
| <i>Cassipourea elliptica</i>     | 59.9 (51.2, 70.4) | 0.74 (0.69, 0.80) | 23.5 (19.7, 27.9) | 0.536 (0.313, 0.908) | 1.39 (1.21, 1.56) |
| <i>Cavanillesia platanifolia</i> | 51.7 (45.5, 60.2) | 0.77 (0.68, 0.87) | 16.9 (12.5, 22.0) | 0.524 (0.220, 1.245) | 1.21 (1.04, 1.39) |
| <i>Cecropia insignis</i>         | 47.1 (41.6, 54.1) | 0.96 (0.90, 1.03) | 22.9 (20.3, 25.9) | 0.254 (0.195, 0.328) | 1.65 (1.56, 1.75) |
| <i>Cecropia obtusifolia</i>      | 40.1 (32.3, 50.2) | 0.88 (0.71, 1.05) | 12.4 (7.1, 18.8)  | 0.665 (0.304, 1.678) | 1.20 (0.93, 1.44) |
| <i>Ceiba pentandra</i>           | 53.6 (48.1, 60.7) | 0.79 (0.72, 0.88) | 23.8 (20.2, 28.1) | 0.288 (0.143, 0.576) | 1.51 (1.36, 1.65) |
| <i>Celtis schippii</i>           | 58.8 (50.2, 69.6) | 0.76 (0.69, 0.83) | 20.8 (17.2, 25.1) | 0.633 (0.277, 1.434) | 1.37 (1.14, 1.63) |
| <i>Chrysophyllum argenteum</i>   | 57.6 (49.7, 66.3) | 0.79 (0.75, 0.84) | 27.0 (23.4, 31.3) | 0.758 (0.625, 0.924) | 1.24 (1.13, 1.35) |
| <i>Chrysophyllum cainito</i>     | 63.0 (53.6, 75.8) | 0.75 (0.65, 0.85) | 22.3 (15.7, 29.3) | 0.585 (0.243, 1.405) | 1.36 (1.14, 1.58) |
| <i>Conostegia cinnamomea</i>     | 56.9 (48.3, 67.0) | 0.71 (0.55, 0.86) | 24.7 (20.4, 29.6) | 1.380 (0.871, 2.189) | 1.15 (0.94, 1.36) |
| <i>Cordia alliodora</i>          | 56.6 (48.7, 66.4) | 0.82 (0.74, 0.91) | 21.0 (17.0, 25.6) | 0.530 (0.221, 1.312) | 1.29 (1.05, 1.53) |
| <i>Cordia bicolor</i>            | 49.9 (42.5, 57.9) | 0.86 (0.82, 0.92) | 23.9 (20.5, 27.6) | 0.270 (0.216, 0.335) | 1.44 (1.35, 1.53) |
| <i>Cordia lasiocalyx</i>         | 58.3 (49.4, 69.1) | 0.64 (0.57, 0.71) | 20.1 (16.4, 24.5) | 0.340 (0.200, 0.581) | 1.36 (1.16, 1.56) |
| <i>Coussarea curvigemma</i>      | 57.1 (49.1, 66.2) | 0.74 (0.68, 0.80) | 24.2 (20.3, 28.3) | 0.577 (0.360, 0.955) | 1.31 (1.12, 1.50) |
| <i>Croton billbergianus</i>      | 50.0 (42.0, 59.8) | 0.77 (0.66, 0.87) | 18.9 (14.4, 23.8) | 0.732 (0.336, 1.627) | 1.34 (1.09, 1.59) |
| <i>Cupania latifolia</i>         | 55.9 (47.3, 66.5) | 0.73 (0.63, 0.83) | 21.9 (15.9, 27.9) | 0.612 (0.267, 1.418) | 1.36 (1.13, 1.60) |
| <i>Cupania seemannii</i>         | 61.4 (51.3, 73.1) | 0.65 (0.57, 0.73) | 19.4 (15.6, 23.8) | 0.800 (0.436, 1.430) | 1.36 (1.15, 1.59) |
| <i>Dendropanax arboreus</i>      | 57.1 (48.6, 68.0) | 0.71 (0.62, 0.79) | 24.1 (18.6, 30.2) | 0.531 (0.243, 1.112) | 1.38 (1.18, 1.59) |
| <i>Desmopsis panamensis</i>      | 60.1 (51.4, 70.6) | 0.67 (0.63, 0.71) | 22.7 (19.2, 26.9) | 0.603 (0.362, 1.016) | 1.34 (1.13, 1.54) |
| <i>Diospyros artanthifolia</i>   | 58.8 (49.5, 70.0) | 0.67 (0.60, 0.74) | 17.8 (14.4, 21.8) | 0.470 (0.202, 1.043) | 1.35 (1.09, 1.61) |
| <i>Dipteryx oleifera</i>         | 64.5 (57.4, 74.4) | 0.80 (0.73, 0.87) | 23.0 (19.5, 26.8) | 0.530 (0.222, 1.178) | 1.47 (1.30, 1.67) |
| <i>Drypetes standleyi</i>        | 55.4 (47.4, 64.3) | 0.78 (0.75, 0.82) | 22.6 (19.5, 26.2) | 0.794 (0.679, 0.933) | 1.27 (1.19, 1.34) |
| <i>Enterolobium schomburgkii</i> | 55.5 (46.8, 66.3) | 0.77 (0.65, 0.89) | 18.9 (13.8, 24.4) | 0.880 (0.452, 1.830) | 1.23 (0.99, 1.46) |
| <i>Erythroxylum macrophyllum</i> | 60.6 (51.2, 72.1) | 0.68 (0.57, 0.79) | 23.0 (17.4, 29.3) | 0.544 (0.266, 1.202) | 1.35 (1.08, 1.61) |
| <i>Eugenia coloradoensis</i>     | 62.5 (53.4, 74.3) | 0.75 (0.69, 0.81) | 22.1 (18.4, 26.7) | 0.560 (0.273, 1.126) | 1.35 (1.12, 1.57) |
| <i>Eugenia galalonensis</i>      | 61.8 (52.7, 73.2) | 0.71 (0.64, 0.78) | 22.0 (18.0, 26.6) | 0.598 (0.341, 1.030) | 1.33 (1.14, 1.54) |
| <i>Eugenia nesiotica</i>         | 61.8 (51.9, 73.6) | 0.72 (0.63, 0.81) | 24.4 (18.9, 30.5) | 0.650 (0.277, 1.386) | 1.38 (1.15, 1.63) |
| <i>Eugenia oerstediana</i>       | 54.8 (46.9, 63.1) | 0.77 (0.73, 0.81) | 26.9 (23.0, 31.1) | 0.803 (0.632, 1.020) | 1.34 (1.23, 1.45) |
| <i>Faramaea occidentalis</i>     | 59.1 (50.0, 69.2) | 0.65 (0.61, 0.68) | 20.5 (17.2, 24.3) | 0.663 (0.489, 0.902) | 1.25 (1.12, 1.38) |
| <i>Ficus costaricana</i>         | 59.6 (50.6, 71.1) | 0.70 (0.61, 0.79) | 23.4 (17.0, 30.2) | 0.564 (0.233, 1.391) | 1.18 (0.98, 1.37) |
| <i>Ficus maxima</i>              | 51.6 (43.7, 61.8) | 0.81 (0.69, 0.93) | 19.5 (14.5, 25.3) | 0.382 (0.183, 0.767) | 1.41 (1.17, 1.65) |

|                                  |                   |                   |                   |                      |                   |
|----------------------------------|-------------------|-------------------|-------------------|----------------------|-------------------|
| <i>Ficus tonduzii</i>            | 58.3 (49.3, 69.2) | 0.66 (0.56, 0.77) | 23.3 (18.0, 29.2) | 0.573 (0.260, 1.282) | 1.33 (1.07, 1.60) |
| <i>Ficus trigonata</i>           | 48.5 (41.8, 57.3) | 0.81 (0.70, 0.93) | 20.4 (15.1, 26.3) | 0.651 (0.314, 1.392) | 1.30 (1.13, 1.49) |
| <i>Ficus yoponensis</i>          | 44.1 (37.5, 53.4) | 0.86 (0.74, 1.00) | 16.7 (12.2, 22.2) | 0.491 (0.249, 0.937) | 1.44 (1.27, 1.61) |
| <i>Garcinia intermedia</i>       | 57.6 (49.8, 66.6) | 0.77 (0.73, 0.81) | 26.7 (22.9, 30.9) | 0.819 (0.675, 0.985) | 1.26 (1.15, 1.38) |
| <i>Garcinia madruno</i>          | 58.0 (49.4, 68.1) | 0.72 (0.67, 0.77) | 22.8 (19.3, 26.9) | 0.616 (0.275, 1.396) | 1.36 (1.09, 1.63) |
| <i>Genipa americana</i>          | 63.8 (53.3, 77.4) | 0.66 (0.57, 0.76) | 24.0 (18.0, 30.5) | 0.594 (0.249, 1.327) | 1.40 (1.16, 1.65) |
| <i>Guapira standleyana</i>       | 64.4 (55.0, 76.4) | 0.70 (0.65, 0.77) | 21.9 (18.2, 26.1) | 0.597 (0.280, 1.353) | 1.29 (1.09, 1.49) |
| <i>Guarea grandifolia</i>        | 59.3 (50.4, 70.1) | 0.74 (0.64, 0.84) | 21.8 (15.5, 28.6) | 0.601 (0.256, 1.403) | 1.34 (1.13, 1.55) |
| <i>Guarea guidonia</i>           | 60.5 (50.5, 73.1) | 0.60 (0.53, 0.66) | 19.5 (15.5, 23.9) | 0.517 (0.239, 1.100) | 1.32 (1.10, 1.54) |
| <i>Guarea fuzzy</i>              | 61.9 (52.5, 73.2) | 0.70 (0.63, 0.77) | 23.9 (19.8, 28.5) | 0.263 (0.141, 0.474) | 1.44 (1.25, 1.67) |
| <i>Guatteria dumetorum</i>       | 65.0 (55.8, 76.5) | 0.74 (0.68, 0.81) | 22.0 (18.2, 26.4) | 0.635 (0.314, 1.253) | 1.29 (1.10, 1.47) |
| <i>Guazuma ulmifolia</i>         | 48.3 (39.7, 58.2) | 0.70 (0.62, 0.79) | 15.4 (12.0, 19.4) | 0.618 (0.275, 1.462) | 1.30 (1.08, 1.52) |
| <i>Gustavia superba</i>          | 54.6 (46.0, 65.2) | 0.69 (0.59, 0.78) | 21.8 (16.8, 27.4) | 0.615 (0.275, 1.364) | 1.31 (1.08, 1.52) |
| <i>Hasseltia floribunda</i>      | 60.7 (51.1, 72.1) | 0.54 (0.47, 0.62) | 20.3 (16.0, 25.2) | 0.683 (0.339, 1.410) | 1.28 (1.04, 1.50) |
| <i>Heisteria acuminata</i>       | 58.9 (49.9, 69.6) | 0.66 (0.61, 0.71) | 20.5 (17.0, 24.3) | 0.875 (0.439, 1.822) | 1.32 (1.04, 1.57) |
| <i>Heisteria concinna</i>        | 48.2 (39.4, 57.5) | 0.68 (0.65, 0.72) | 15.7 (12.8, 18.8) | 0.652 (0.370, 1.153) | 1.37 (1.18, 1.55) |
| <i>Hirtella americana</i>        | 59.3 (49.9, 71.0) | 0.62 (0.56, 0.68) | 17.6 (14.2, 21.5) | 0.485 (0.254, 0.904) | 1.42 (1.17, 1.67) |
| <i>Hirtella triandra</i>         | 57.3 (48.9, 67.2) | 0.71 (0.68, 0.74) | 23.3 (19.8, 27.3) | 0.927 (0.768, 1.130) | 1.25 (1.14, 1.36) |
| <i>Hybanthus prunifolius</i>     | 61.8 (52.3, 72.8) | 0.51 (0.45, 0.58) | 22.6 (19.0, 27.0) | 0.834 (0.508, 1.365) | 1.26 (1.05, 1.47) |
| <i>Hieronyma alchorneoides</i>   | 64.3 (55.3, 76.2) | 0.70 (0.64, 0.77) | 23.0 (18.9, 27.4) | 0.554 (0.234, 1.337) | 1.38 (1.19, 1.58) |
| <i>Inga goldmanii</i>            | 59.0 (49.8, 70.2) | 0.72 (0.62, 0.82) | 23.1 (17.1, 29.5) | 0.639 (0.271, 1.454) | 1.37 (1.13, 1.61) |
| <i>Inga marginata</i>            | 56.1 (47.2, 67.2) | 0.69 (0.61, 0.77) | 17.5 (13.8, 21.8) | 0.658 (0.264, 1.504) | 1.40 (1.17, 1.66) |
| <i>Inga acuminata</i>            | 54.6 (45.5, 65.2) | 0.67 (0.57, 0.77) | 18.7 (13.6, 24.5) | 0.735 (0.366, 1.456) | 1.40 (1.17, 1.62) |
| <i>Inga sapindoides</i>          | 58.3 (49.5, 69.3) | 0.74 (0.64, 0.83) | 22.9 (17.2, 29.0) | 0.657 (0.295, 1.463) | 1.38 (1.13, 1.63) |
| <i>Inga spectabilis</i>          | 53.5 (45.3, 63.6) | 0.73 (0.62, 0.83) | 22.1 (16.3, 28.3) | 0.541 (0.233, 1.231) | 1.37 (1.12, 1.61) |
| <i>Inga umbellifera</i>          | 63.5 (53.0, 76.4) | 0.59 (0.51, 0.66) | 17.2 (14.0, 21.2) | 0.881 (0.408, 1.959) | 1.32 (1.05, 1.57) |
| <i>Jacaranda copaia</i>          | 51.4 (45.1, 60.0) | 0.75 (0.68, 0.83) | 14.6 (12.3, 17.1) | 0.500 (0.269, 0.977) | 1.36 (1.20, 1.52) |
| <i>Lacistema aggregatum</i>      | 62.0 (52.5, 73.8) | 0.71 (0.66, 0.77) | 21.9 (18.3, 26.4) | 0.467 (0.198, 1.074) | 1.35 (1.09, 1.63) |
| <i>Lacmellea panamensis</i>      | 53.4 (44.9, 63.6) | 0.69 (0.62, 0.77) | 17.4 (14.0, 21.3) | 0.538 (0.245, 1.371) | 1.31 (1.06, 1.55) |
| <i>Laetia procera</i>            | 48.2 (40.6, 57.8) | 0.81 (0.71, 0.93) | 17.2 (13.2, 21.8) | 0.591 (0.253, 1.422) | 1.40 (1.16, 1.63) |
| <i>Laetia thammia</i>            | 60.3 (50.8, 72.1) | 0.65 (0.59, 0.70) | 18.0 (14.8, 21.7) | 0.705 (0.311, 1.577) | 1.38 (1.10, 1.65) |
| <i>Licania hypoleuca</i>         | 62.5 (52.6, 74.2) | 0.67 (0.63, 0.71) | 20.7 (17.2, 24.8) | 0.725 (0.323, 1.560) | 1.36 (1.11, 1.61) |
| <i>Licania platypus</i>          | 61.0 (51.7, 72.8) | 0.72 (0.63, 0.82) | 23.4 (17.5, 29.7) | 0.639 (0.310, 1.432) | 1.24 (1.00, 1.44) |
| <i>Lindackeria laurina</i>       | 57.4 (48.2, 68.6) | 0.71 (0.60, 0.80) | 23.3 (17.5, 29.3) | 0.488 (0.219, 1.090) | 1.35 (1.10, 1.59) |
| <i>Lonchocarpus heptaphyllus</i> | 63.9 (54.5, 75.5) | 0.75 (0.70, 0.81) | 21.4 (17.8, 25.7) | 0.189 (0.112, 0.320) | 1.53 (1.38, 1.70) |
| <i>Luehea seemannii</i>          | 55.1 (48.7, 62.9) | 0.78 (0.74, 0.83) | 26.9 (23.6, 30.5) | 0.526 (0.230, 1.262) | 1.33 (1.13, 1.52) |
| <i>Macrocenium roseum</i>        | 59.4 (50.2, 70.6) | 0.71 (0.61, 0.81) | 23.7 (17.6, 30.0) | 0.569 (0.247, 1.312) | 1.30 (1.06, 1.54) |
| <i>Mosannonna garwoodii</i>      | 60.1 (50.8, 70.9) | 0.70 (0.65, 0.76) | 20.4 (16.9, 24.3) | 0.468 (0.212, 1.030) | 1.37 (1.11, 1.62) |
| <i>Maquira quianensis</i>        | 59.1 (50.2, 69.5) | 0.68 (0.63, 0.74) | 21.2 (17.6, 25.4) | 0.517 (0.297, 0.902) | 1.33 (1.12, 1.53) |
| <i>Marila laxiflora</i>          | 56.2 (48.0, 65.9) | 0.64 (0.51, 0.77) | 23.0 (19.1, 27.6) | 0.647 (0.406, 1.032) | 1.33 (1.13, 1.52) |
| <i>Maytenus schippii</i>         | 61.4 (51.8, 73.6) | 0.75 (0.64, 0.85) | 21.7 (15.5, 28.0) | 0.525 (0.226, 1.230) | 1.34 (1.07, 1.61) |
| <i>Miconia argentea</i>          | 50.8 (42.7, 60.1) | 0.79 (0.74, 0.85) | 18.2 (15.3, 21.7) | 0.626 (0.480, 0.814) | 1.34 (1.22, 1.46) |
| <i>Miconia nervosa</i>           | 54.9 (46.3, 64.2) | 0.70 (0.56, 0.84) | 24.3 (19.9, 29.2) | 0.862 (0.556, 1.301) | 1.26 (1.06, 1.46) |
| <i>Mouriri myrtilloides</i>      | 62.5 (52.7, 74.2) | 0.51 (0.46, 0.57) | 19.4 (16.2, 23.4) | 0.898 (0.579, 1.406) | 1.32 (1.12, 1.53) |
| <i>Myrcia gatunensis</i>         | 61.2 (51.5, 73.5) | 0.64 (0.56, 0.72) | 17.8 (14.3, 21.8) | 0.642 (0.325, 1.301) | 1.34 (1.08, 1.58) |
| <i>Myrospermum frutescens</i>    | 66.4 (55.8, 79.6) | 0.76 (0.65, 0.86) | 20.7 (14.6, 27.4) | 0.423 (0.180, 0.923) | 1.47 (1.24, 1.73) |
| <i>Nectandra cissiflora</i>      | 55.6 (46.3, 66.4) | 0.75 (0.62, 0.87) | 17.2 (11.6, 23.6) | 0.518 (0.238, 1.146) | 1.35 (1.10, 1.61) |
| <i>Nectandra purpurea</i>        | 55.0 (46.7, 64.9) | 0.74 (0.68, 0.80) | 19.5 (16.1, 23.3) | 0.665 (0.319, 1.384) | 1.34 (1.09, 1.57) |
| <i>Ochroma pyramidale</i>        | 34.6 (28.1, 44.7) | 0.90 (0.73, 1.08) | 13.4 (6.4, 21.0)  | 0.702 (0.260, 1.815) | 1.39 (1.14, 1.64) |
| <i>Ocotea oblonga</i>            | 51.4 (43.2, 61.2) | 0.75 (0.64, 0.85) | 20.5 (14.7, 26.5) | 0.562 (0.239, 1.312) | 1.31 (1.07, 1.54) |
| <i>Ocotea puberula</i>           | 56.5 (47.9, 67.1) | 0.75 (0.65, 0.86) | 20.9 (14.6, 27.9) | 0.584 (0.232, 1.364) | 1.37 (1.14, 1.60) |
| <i>Ocotea whitei</i>             | 57.4 (49.3, 67.6) | 0.78 (0.69, 0.88) | 22.0 (16.9, 27.5) | 0.717 (0.339, 1.584) | 1.24 (1.04, 1.43) |
| <i>Ormosia coccinea</i>          | 60.0 (51.0, 71.6) | 0.77 (0.66, 0.88) | 21.3 (15.9, 27.0) | 0.391 (0.192, 0.850) | 1.33 (1.13, 1.55) |
| <i>Ormosia macrocalyx</i>        | 58.2 (50.1, 68.2) | 0.81 (0.73, 0.91) | 28.1 (23.2, 33.5) | 0.264 (0.150, 0.467) | 1.43 (1.26, 1.61) |
| <i>Ouratea lucens</i>            | 66.2 (55.9, 79.0) | 0.74 (0.67, 0.82) | 21.2 (17.6, 25.6) | 0.288 (0.147, 0.527) | 1.47 (1.24, 1.72) |
| <i>Perebea xanthochyma</i>       | 59.7 (50.6, 70.9) | 0.66 (0.62, 0.71) | 19.7 (16.5, 23.4) | 0.666 (0.306, 1.493) | 1.33 (1.06, 1.58) |
| <i>Cinnamomum triplinerve</i>    | 55.3 (47.2, 65.4) | 0.72 (0.65, 0.81) | 19.2 (15.2, 23.6) | 0.291 (0.133, 0.659) | 1.39 (1.14, 1.64) |
| <i>Picramnia latifolia</i>       | 63.4 (53.2, 76.2) | 0.56 (0.48, 0.64) | 19.7 (15.7, 24.3) | 0.147 (0.070, 0.281) | 1.77 (1.54, 2.04) |
| <i>Piper reticulatum</i>         | 56.7 (48.3, 67.3) | 0.72 (0.60, 0.84) | 22.1 (17.0, 27.8) | 0.660 (0.338, 1.342) | 1.32 (1.04, 1.56) |
| <i>Platymiscium pinnatum</i>     | 65.7 (56.1, 78.3) | 0.68 (0.60, 0.75) | 18.7 (14.7, 23.3) | 0.479 (0.199, 1.174) | 1.35 (1.12, 1.56) |
| <i>Platypodium elegans</i>       | 59.3 (52.0, 68.8) | 0.77 (0.70, 0.85) | 23.3 (19.9, 27.3) | 0.811 (0.353, 1.804) | 1.22 (1.04, 1.41) |
| <i>Pachira sessilis</i>          | 58.1 (50.2, 68.3) | 0.78 (0.72, 0.84) | 20.4 (17.2, 24.4) | 0.504 (0.299, 0.861) | 1.25 (1.07, 1.41) |

|                                     |                   |                   |                   |                      |                   |
|-------------------------------------|-------------------|-------------------|-------------------|----------------------|-------------------|
| <i>Poulsenia armata</i>             | 57.4 (51.4, 64.8) | 0.86 (0.82, 0.91) | 33.1 (29.4, 37.4) | 0.332 (0.168, 0.636) | 1.32 (1.16, 1.50) |
| <i>Pourouma bicolor</i>             | 51.1 (42.4, 61.2) | 0.71 (0.64, 0.78) | 16.4 (13.4, 19.8) | 0.600 (0.237, 1.520) | 1.39 (1.14, 1.65) |
| <i>Pouteria reticulata</i>          | 63.3 (54.5, 75.0) | 0.71 (0.66, 0.75) | 20.6 (17.5, 24.5) | 0.690 (0.400, 1.225) | 1.32 (1.16, 1.47) |
| <i>Prioria copaifera</i>            | 60.1 (55.4, 65.7) | 0.86 (0.83, 0.89) | 36.5 (33.9, 39.5) | 0.908 (0.787, 1.050) | 1.18 (1.14, 1.22) |
| <i>Protium costaricense</i>         | 60.8 (51.0, 72.9) | 0.61 (0.54, 0.69) | 19.3 (15.2, 23.9) | 0.661 (0.328, 1.308) | 1.38 (1.14, 1.61) |
| <i>Protium panamense</i>            | 61.8 (52.2, 73.8) | 0.68 (0.65, 0.72) | 19.8 (16.7, 23.7) | 0.356 (0.201, 0.636) | 1.42 (1.22, 1.62) |
| <i>Protium confusum</i>             | 54.5 (45.5, 64.7) | 0.68 (0.62, 0.75) | 16.7 (13.7, 20.2) | 0.760 (0.482, 1.179) | 1.25 (1.05, 1.44) |
| <i>Protium tenuifolium</i>          | 50.1 (40.8, 59.7) | 0.75 (0.71, 0.81) | 21.2 (17.5, 25.2) | 0.565 (0.436, 0.743) | 1.37 (1.26, 1.47) |
| <i>Pseudobombax septenatum</i>      | 52.7 (45.6, 62.2) | 0.80 (0.70, 0.90) | 20.6 (14.6, 26.9) | 0.550 (0.240, 1.351) | 1.28 (1.06, 1.48) |
| <i>Psychotria marginata</i>         | 56.9 (48.5, 66.6) | 0.68 (0.55, 0.81) | 26.1 (21.5, 31.0) | 0.552 (0.347, 0.868) | 1.36 (1.17, 1.56) |
| <i>Pterocarpus rohrii</i>           | 62.8 (53.9, 73.8) | 0.75 (0.69, 0.81) | 23.3 (19.8, 27.6) | 0.534 (0.289, 1.044) | 1.37 (1.17, 1.55) |
| <i>Quararibea asterolepis</i>       | 57.8 (52.1, 64.6) | 0.86 (0.82, 0.89) | 32.0 (29.1, 35.5) | 1.052 (0.884, 1.253) | 1.09 (1.03, 1.14) |
| <i>Quassia amara</i>                | 63.9 (53.9, 76.2) | 0.56 (0.50, 0.62) | 21.5 (17.8, 26.0) | 0.591 (0.280, 1.264) | 1.34 (1.07, 1.60) |
| <i>Randia armata</i>                | 61.3 (51.8, 72.9) | 0.52 (0.45, 0.60) | 20.6 (16.3, 25.4) | 0.771 (0.351, 1.651) | 1.35 (1.11, 1.59) |
| <i>Rinorea sylvatica</i>            | 61.2 (52.3, 71.6) | 0.64 (0.59, 0.69) | 24.9 (21.1, 29.4) | 1.095 (0.593, 2.023) | 1.27 (1.03, 1.50) |
| <i>Sapium glandulosum</i>           | 57.1 (49.2, 67.2) | 0.80 (0.71, 0.90) | 22.2 (16.6, 28.3) | 0.489 (0.206, 1.084) | 1.40 (1.19, 1.63) |
| <i>Simarouba amara</i>              | 39.9 (35.8, 44.8) | 1.01 (0.97, 1.06) | 21.9 (19.7, 24.6) | 0.538 (0.458, 0.631) | 1.32 (1.25, 1.40) |
| <i>Siparuna guianensis</i>          | 58.6 (49.3, 69.6) | 0.76 (0.64, 0.89) | 21.7 (16.7, 27.3) | 0.680 (0.358, 1.274) | 1.30 (1.06, 1.55) |
| <i>Sloanea terniflora</i>           | 55.7 (49.4, 62.8) | 0.92 (0.87, 0.97) | 33.0 (29.4, 37.0) | 0.546 (0.429, 0.690) | 1.35 (1.27, 1.43) |
| <i>Sorocea affinis</i>              | 61.6 (52.1, 72.8) | 0.61 (0.57, 0.65) | 21.5 (17.9, 25.6) | 0.356 (0.210, 0.611) | 1.37 (1.16, 1.58) |
| <i>Spondias mombin</i>              | 50.1 (42.4, 59.7) | 0.78 (0.68, 0.89) | 20.0 (14.2, 26.3) | 0.526 (0.223, 1.248) | 1.42 (1.21, 1.63) |
| <i>Spondias radlkoferi</i>          | 54.2 (47.1, 62.2) | 0.80 (0.76, 0.85) | 28.3 (24.5, 32.3) | 0.238 (0.179, 0.314) | 1.54 (1.44, 1.65) |
| <i>Sterculia apetala</i>            | 59.3 (52.3, 67.5) | 0.82 (0.76, 0.89) | 26.9 (23.2, 31.2) | 0.487 (0.247, 0.966) | 1.39 (1.23, 1.57) |
| <i>Swartzia simplex grandiflora</i> | 64.9 (54.6, 78.0) | 0.56 (0.50, 0.62) | 18.6 (15.0, 23.0) | 0.482 (0.254, 0.870) | 1.48 (1.30, 1.69) |
| <i>Swartzia simplex ochracea</i>    | 64.6 (54.4, 76.7) | 0.60 (0.56, 0.64) | 22.1 (18.5, 26.5) | 0.378 (0.216, 0.637) | 1.55 (1.37, 1.75) |
| <i>Symphonia globulifera</i>        | 58.6 (49.8, 69.9) | 0.78 (0.67, 0.88) | 20.5 (14.1, 27.0) | 0.546 (0.227, 1.295) | 1.36 (1.13, 1.61) |
| <i>Tabebuia quayacan</i>            | 58.4 (51.1, 67.5) | 0.80 (0.74, 0.86) | 25.6 (22.4, 29.4) | 0.388 (0.210, 0.685) | 1.37 (1.23, 1.53) |
| <i>Tabebuia rosea</i>               | 58.9 (52.3, 66.5) | 0.92 (0.86, 0.98) | 28.8 (25.5, 32.6) | 0.384 (0.289, 0.506) | 1.42 (1.33, 1.51) |
| <i>Tabernaemontana arborea</i>      | 62.0 (53.5, 73.3) | 0.66 (0.61, 0.71) | 23.4 (19.5, 27.8) | 0.552 (0.298, 1.013) | 1.29 (1.13, 1.45) |
| <i>Tachigali versicolor</i>         | 49.7 (44.1, 55.8) | 0.97 (0.92, 1.03) | 28.9 (26.0, 32.2) | 0.647 (0.540, 0.778) | 1.43 (1.36, 1.49) |
| <i>Talisia nervosa</i>              | 65.2 (54.7, 77.4) | 0.60 (0.55, 0.66) | 23.5 (19.4, 28.1) | 0.216 (0.103, 0.436) | 1.48 (1.23, 1.75) |
| <i>Talisia princeps</i>             | 63.0 (53.1, 75.3) | 0.73 (0.61, 0.85) | 23.8 (18.1, 30.1) | 0.131 (0.064, 0.260) | 1.48 (1.23, 1.75) |
| <i>Terminalia amazonia</i>          | 58.7 (50.5, 69.3) | 0.77 (0.66, 0.88) | 19.4 (13.7, 25.8) | 0.556 (0.232, 1.316) | 1.44 (1.21, 1.66) |
| <i>Terminalia oblonga</i>           | 59.9 (52.2, 69.7) | 0.85 (0.77, 0.93) | 25.0 (20.6, 30.0) | 0.624 (0.281, 1.390) | 1.43 (1.23, 1.63) |
| <i>Tetraastris panamensis</i>       | 57.0 (50.0, 65.2) | 0.72 (0.70, 0.75) | 19.9 (17.5, 22.8) | 0.467 (0.397, 0.556) | 1.46 (1.40, 1.52) |
| <i>Tocoyena pittieri</i>            | 53.3 (45.0, 63.7) | 0.73 (0.63, 0.83) | 22.4 (17.2, 28.1) | 0.678 (0.339, 1.314) | 1.32 (1.12, 1.53) |
| <i>Trattinnickia aspera</i>         | 50.4 (42.7, 60.5) | 0.74 (0.64, 0.84) | 14.9 (11.7, 18.6) | 0.537 (0.221, 1.255) | 1.36 (1.13, 1.58) |
| <i>Trema micrantha</i>              | 38.6 (31.0, 49.0) | 0.88 (0.72, 1.04) | 15.0 (8.4, 22.4)  | 0.605 (0.241, 1.403) | 1.42 (1.20, 1.66) |
| <i>Trichilia pallida</i>            | 57.1 (48.3, 68.0) | 0.68 (0.58, 0.78) | 23.3 (17.5, 29.3) | 0.598 (0.266, 1.327) | 1.35 (1.10, 1.60) |
| <i>Trichilia tuberculata</i>        | 57.9 (51.0, 65.7) | 0.83 (0.80, 0.85) | 27.7 (24.4, 31.5) | 0.847 (0.728, 0.988) | 1.19 (1.13, 1.24) |
| <i>Triplaris cumingiana</i>         | 59.0 (50.4, 70.4) | 0.79 (0.68, 0.90) | 19.8 (13.4, 26.4) | 0.474 (0.204, 1.150) | 1.27 (1.01, 1.50) |
| <i>Turpinia occidentalis</i>        | 48.5 (40.3, 57.8) | 0.72 (0.62, 0.81) | 22.5 (17.0, 28.5) | 0.561 (0.232, 1.448) | 1.20 (0.94, 1.43) |
| <i>Unonopsis pittieri</i>           | 58.5 (49.5, 69.7) | 0.76 (0.66, 0.87) | 21.3 (15.4, 27.7) | 0.428 (0.194, 1.007) | 1.30 (1.03, 1.55) |
| <i>Virola sebifera</i>              | 57.9 (49.7, 67.4) | 0.79 (0.75, 0.84) | 24.4 (21.0, 28.2) | 0.871 (0.499, 1.553) | 1.19 (1.01, 1.36) |
| <i>Virola multiflora</i>            | 55.3 (47.4, 64.7) | 0.78 (0.72, 0.84) | 20.2 (17.1, 23.8) | 0.489 (0.217, 1.306) | 1.31 (1.06, 1.53) |
| <i>Virola surinamensis</i>          | 65.0 (57.2, 75.4) | 0.76 (0.71, 0.81) | 24.1 (20.9, 27.8) | 0.477 (0.231, 1.056) | 1.35 (1.15, 1.52) |
| <i>Vochysia ferruginea</i>          | 50.0 (41.8, 59.8) | 0.78 (0.66, 0.90) | 18.4 (13.1, 24.4) | 0.470 (0.210, 1.030) | 1.42 (1.18, 1.67) |
| <i>Xylopia macrantha</i>            | 54.0 (46.0, 63.9) | 0.76 (0.72, 0.79) | 19.1 (16.1, 22.6) | 0.992 (0.537, 1.908) | 1.24 (1.02, 1.45) |
| <i>Zanthoxylum ekmanii</i>          | 44.1 (38.3, 52.4) | 0.89 (0.77, 1.01) | 16.8 (13.1, 21.0) | 0.442 (0.200, 0.950) | 1.41 (1.21, 1.62) |
| <i>Zanthoxylum panamense</i>        | 60.1 (50.9, 71.5) | 0.77 (0.67, 0.88) | 20.1 (14.1, 26.7) | 0.496 (0.206, 1.111) | 1.43 (1.21, 1.67) |

**Figure S1.** Species-specific relationships of tree height with trunk diameter, showing the data (points) and fitted relationships (solid lines) together with their 90% posterior central intervals (dashed lines). Note the log–log axes (multiple pages).

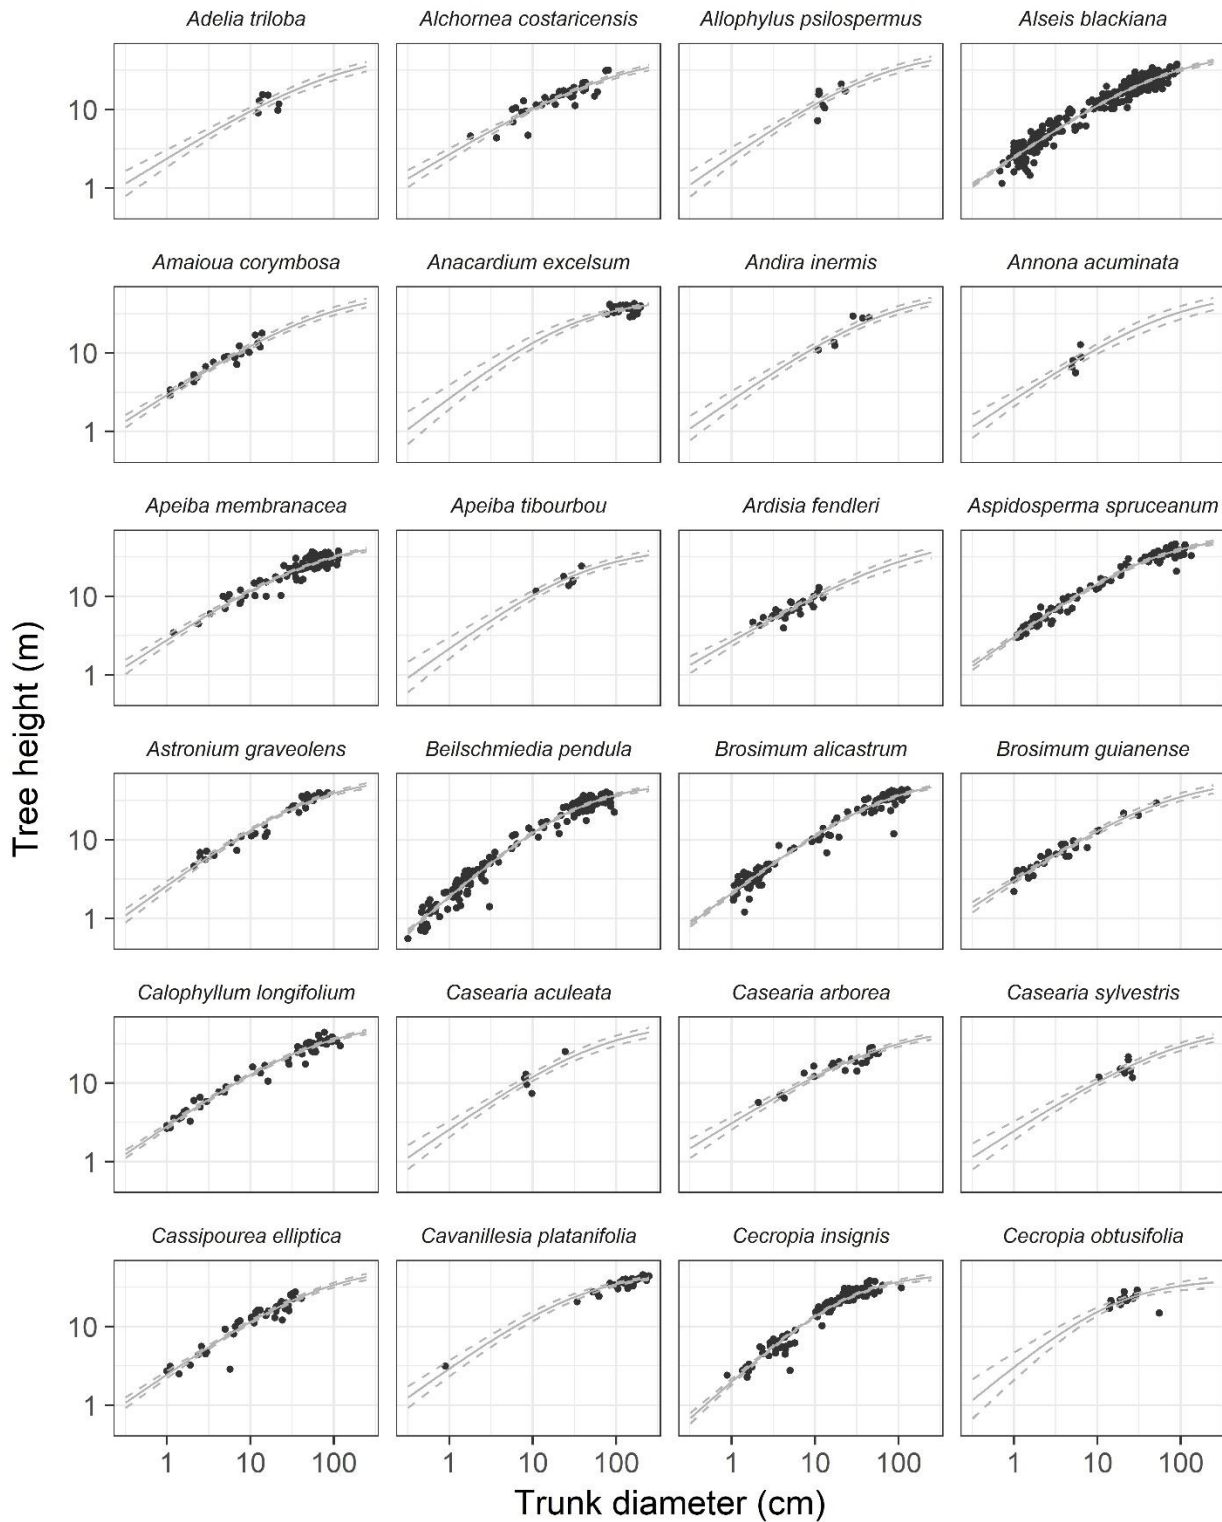

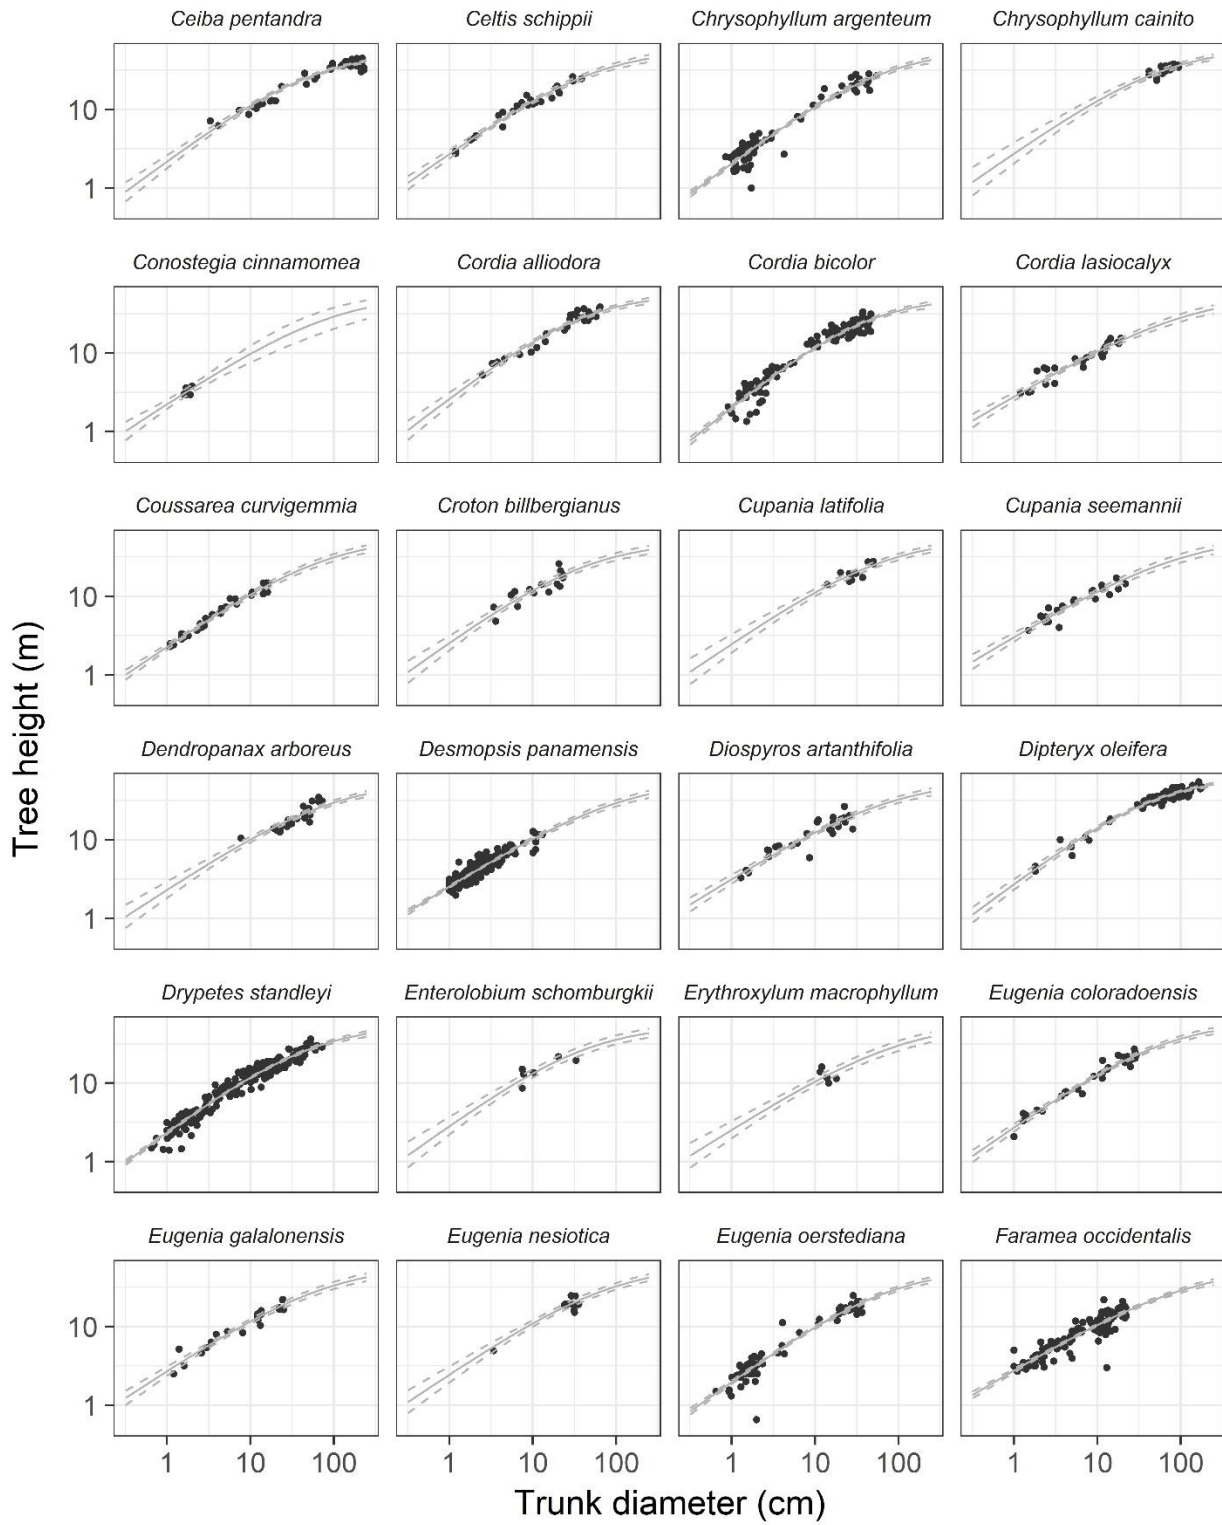

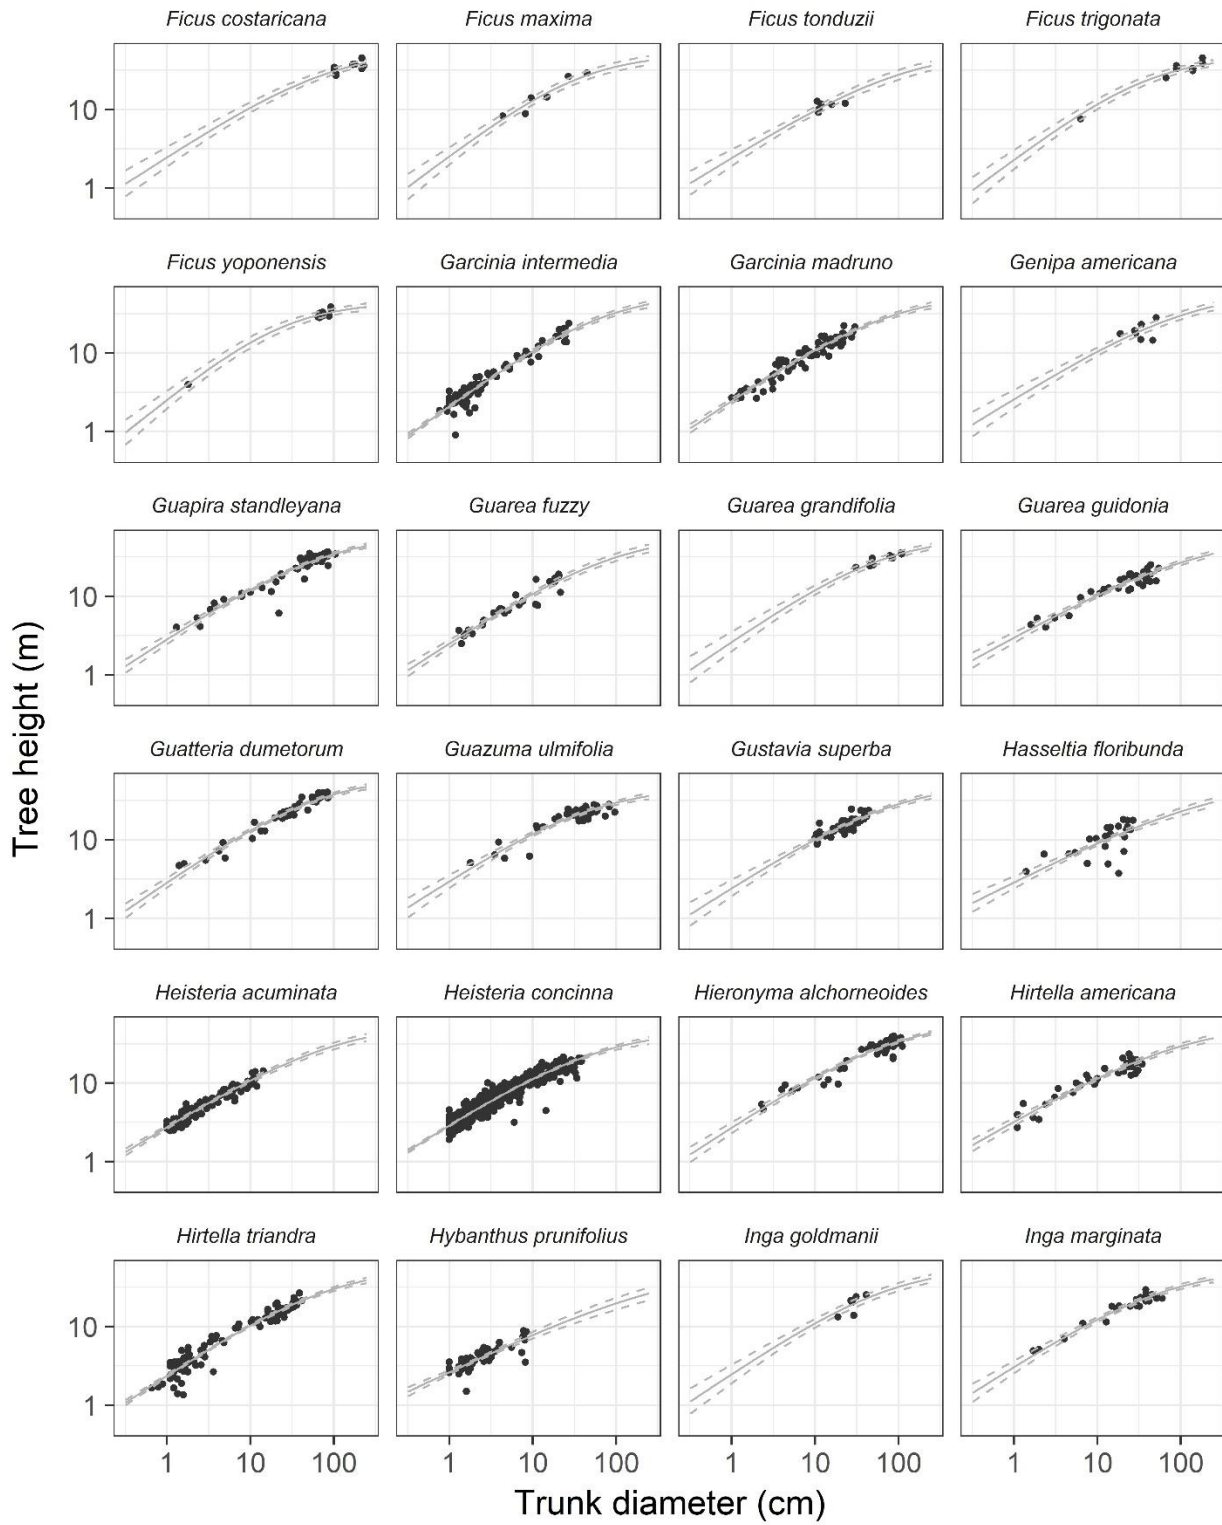



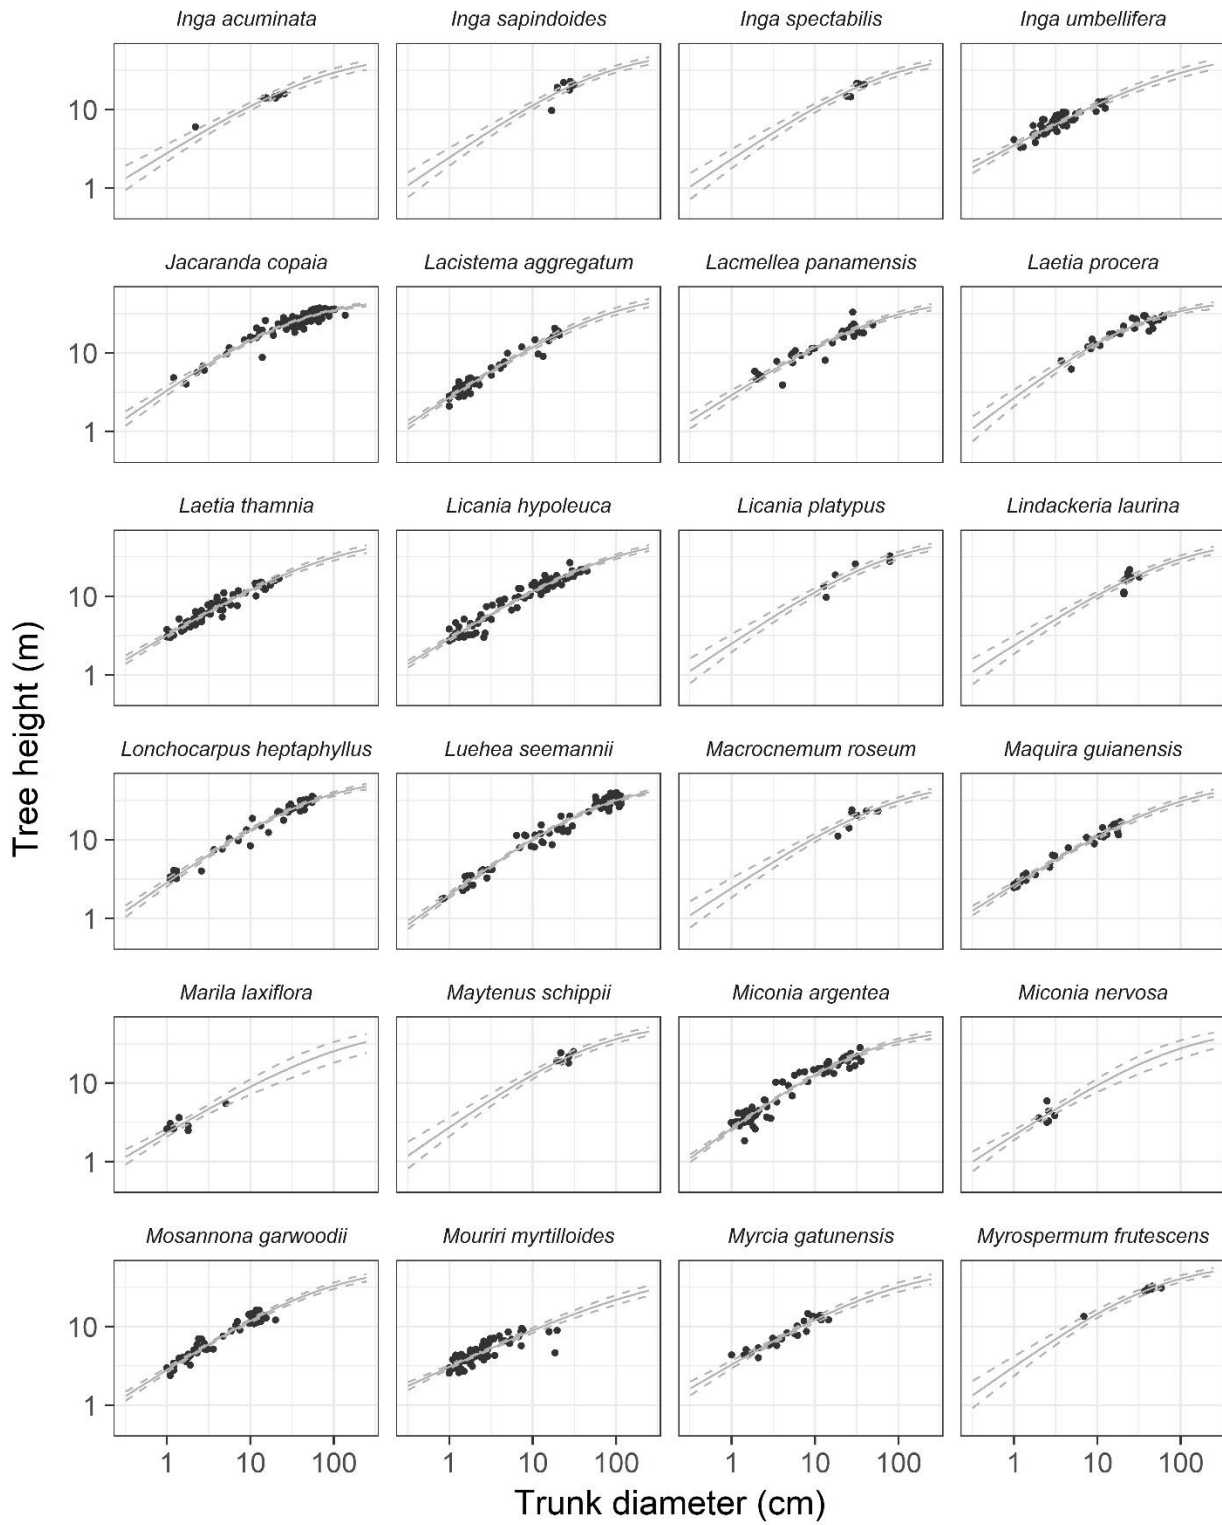

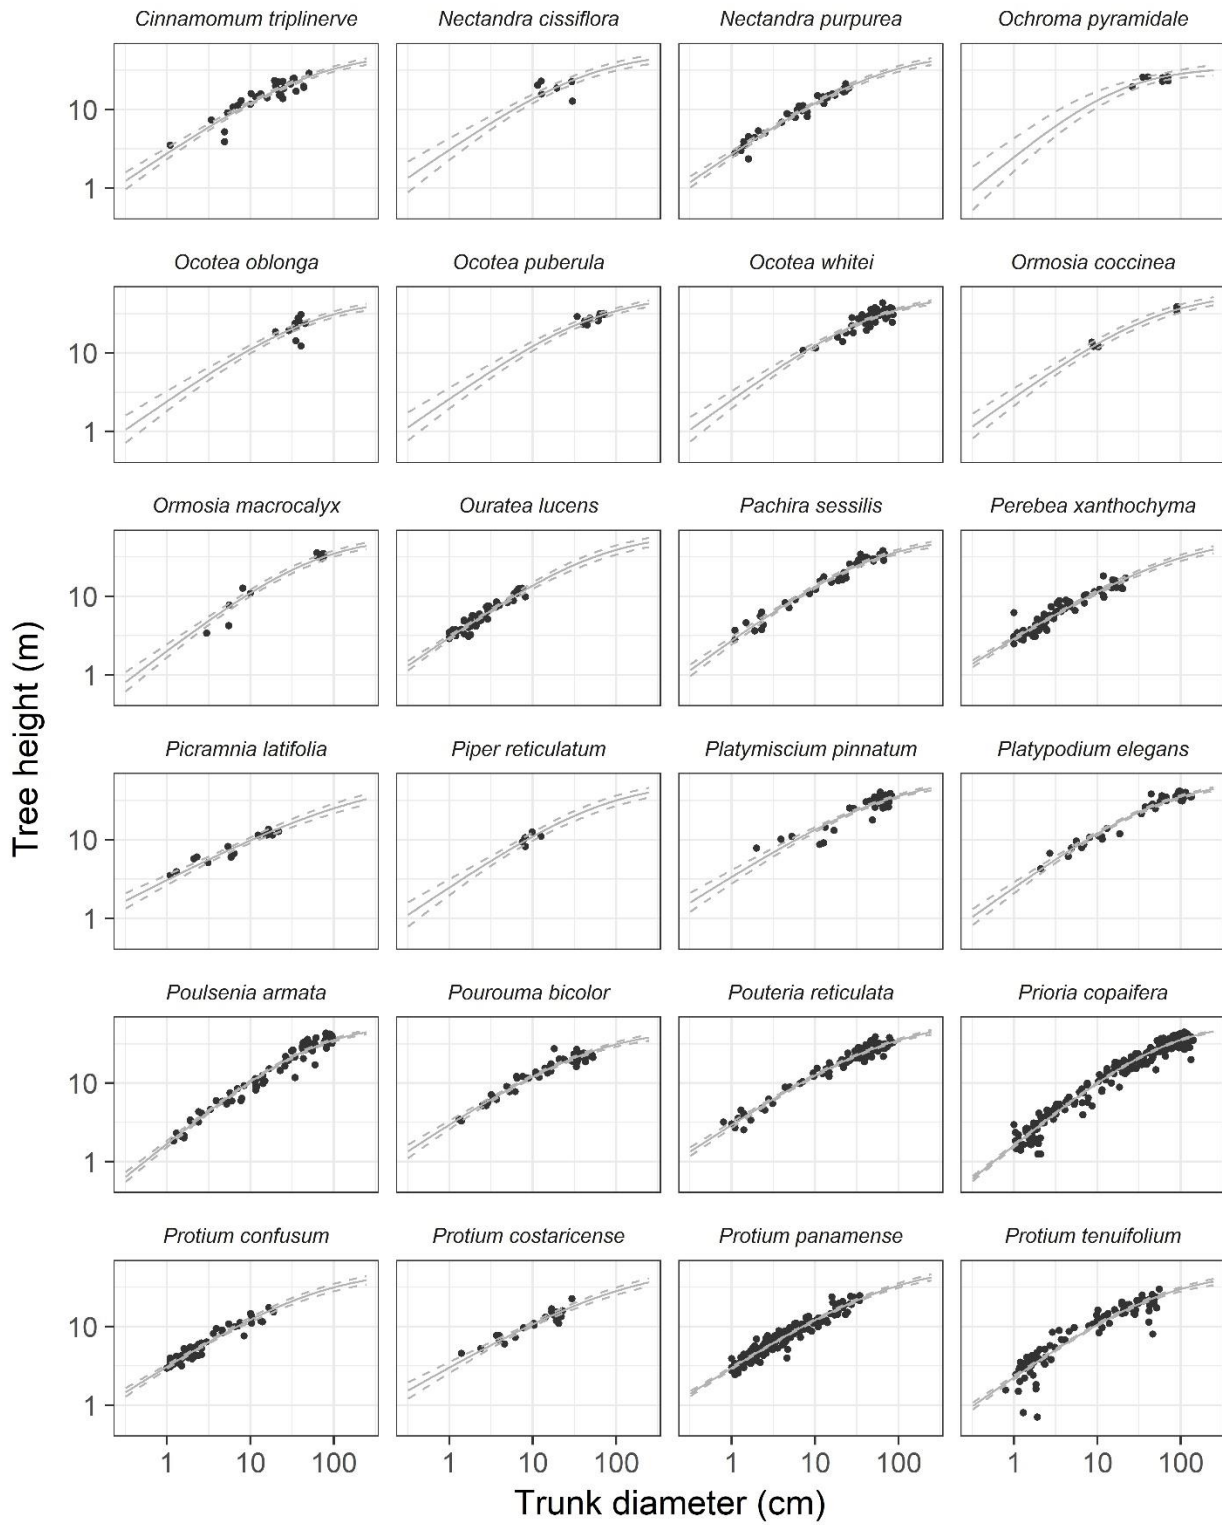

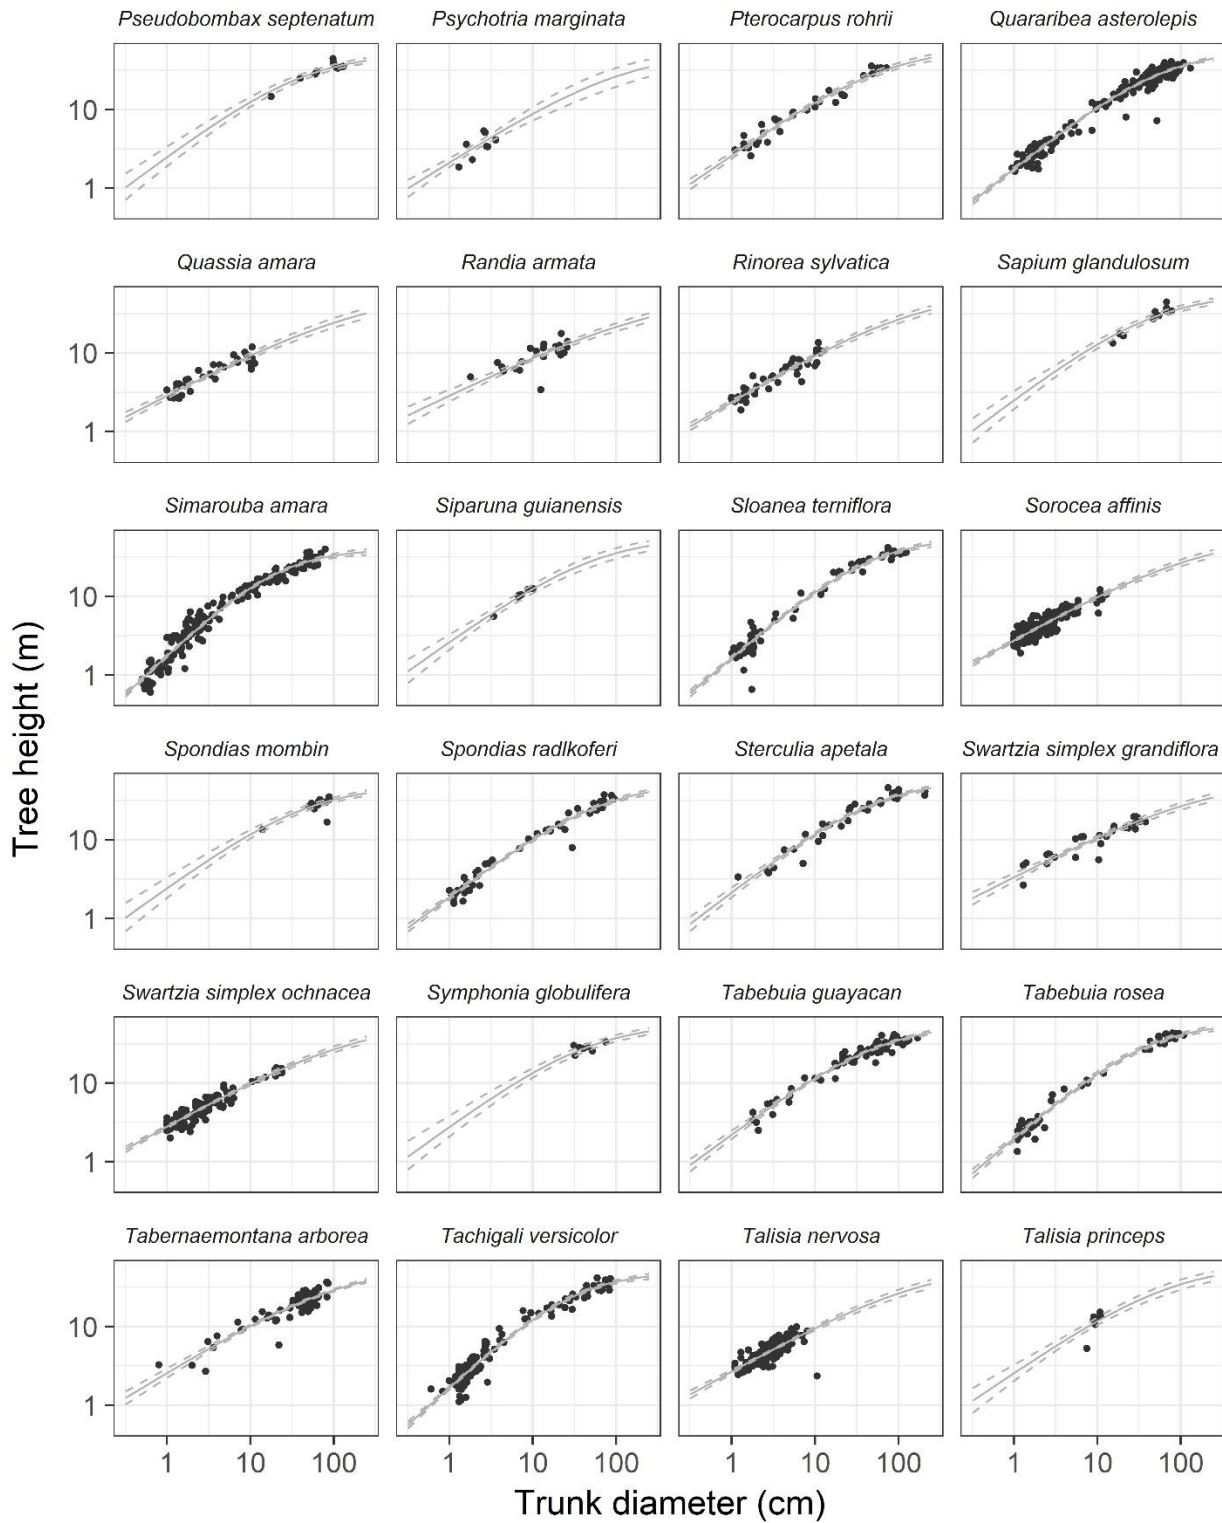

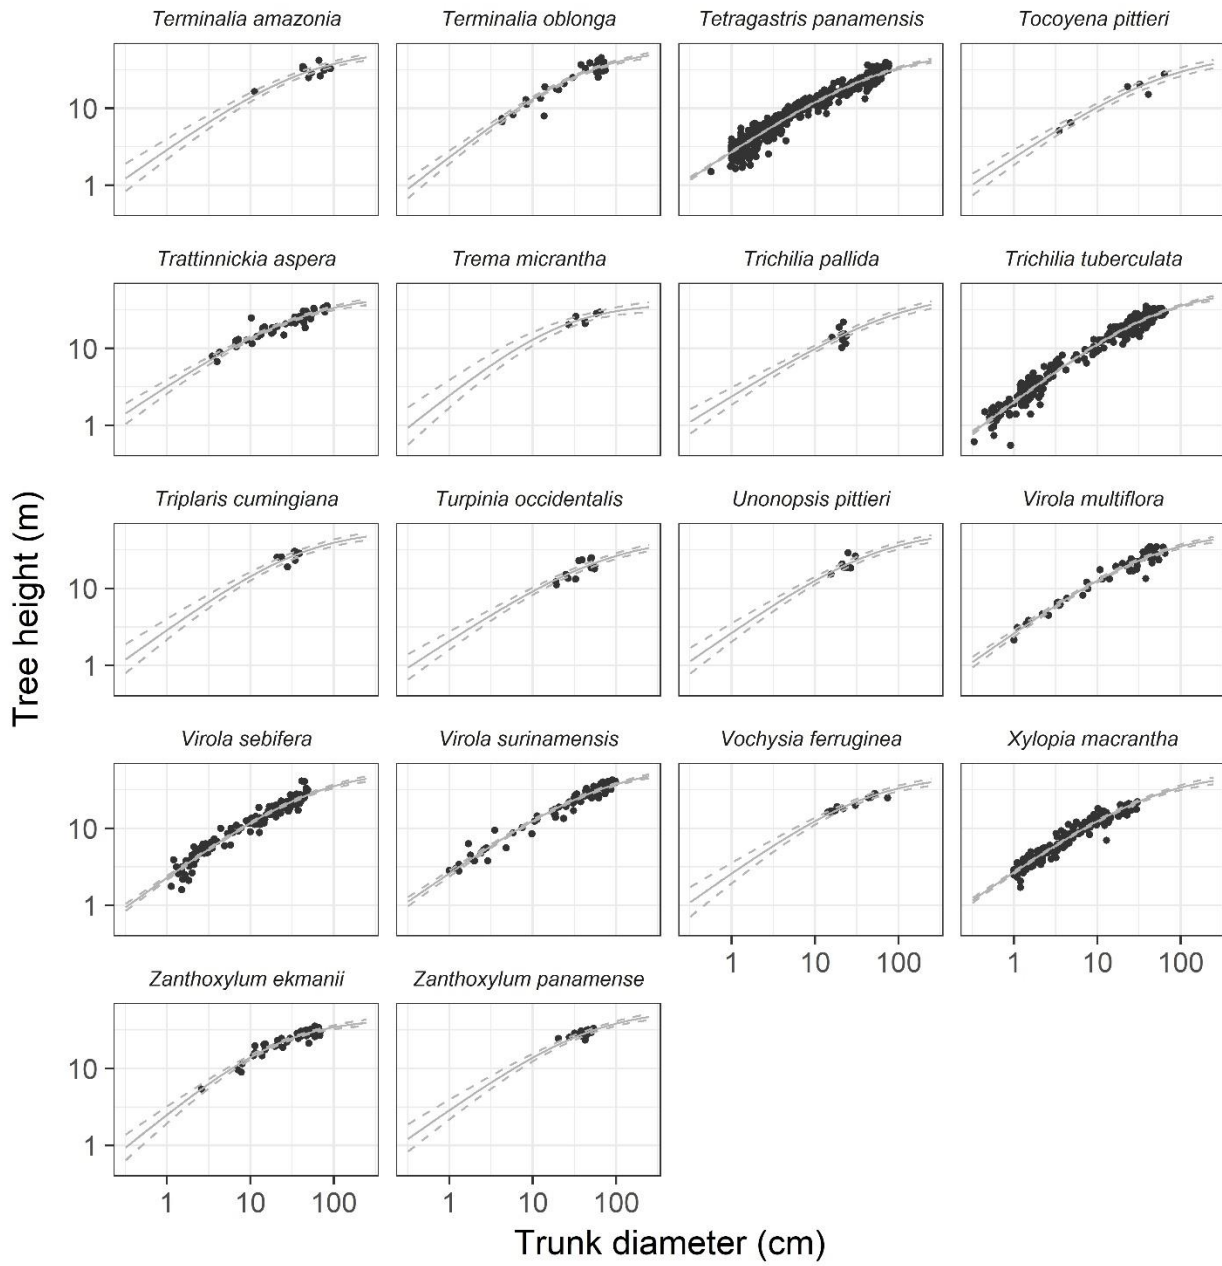

**Figure S2.** Species-specific relationships of crown area with trunk diameter, showing the data (points) and fitted relationships (solid lines) together with their 90% posterior central intervals (dashed lines). Note the log–log axes (multiple pages).

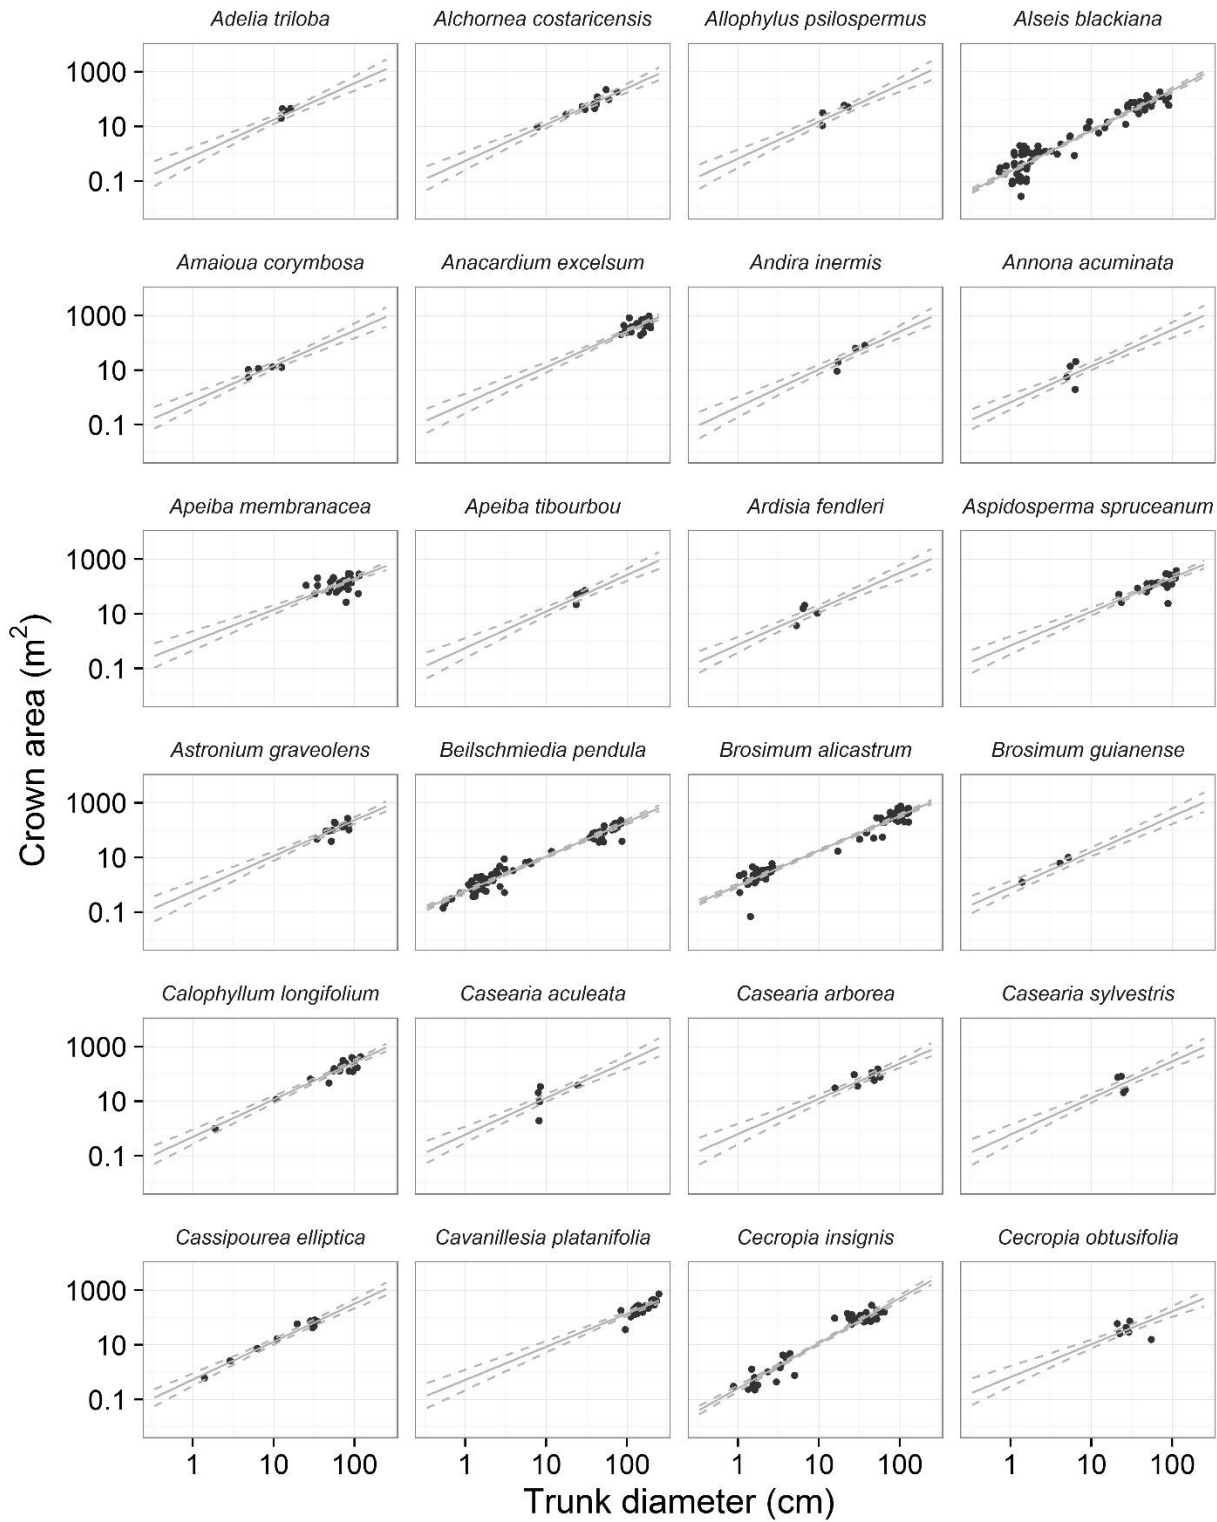

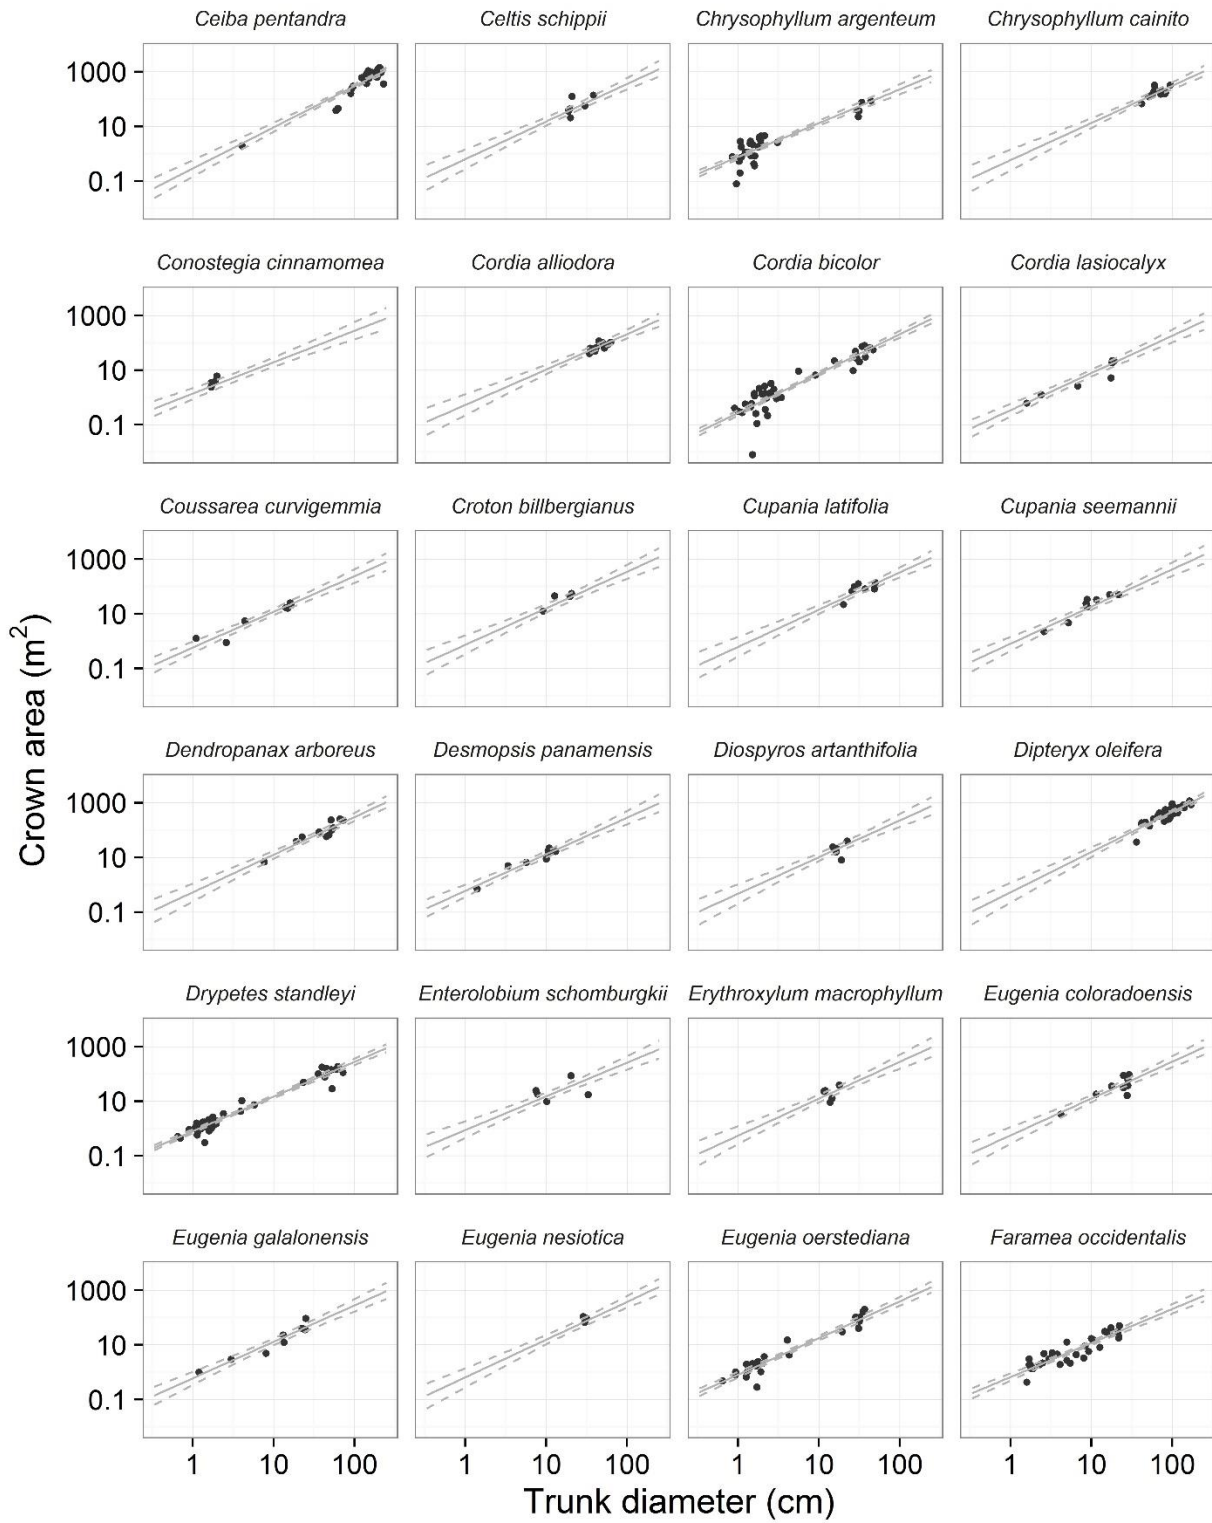

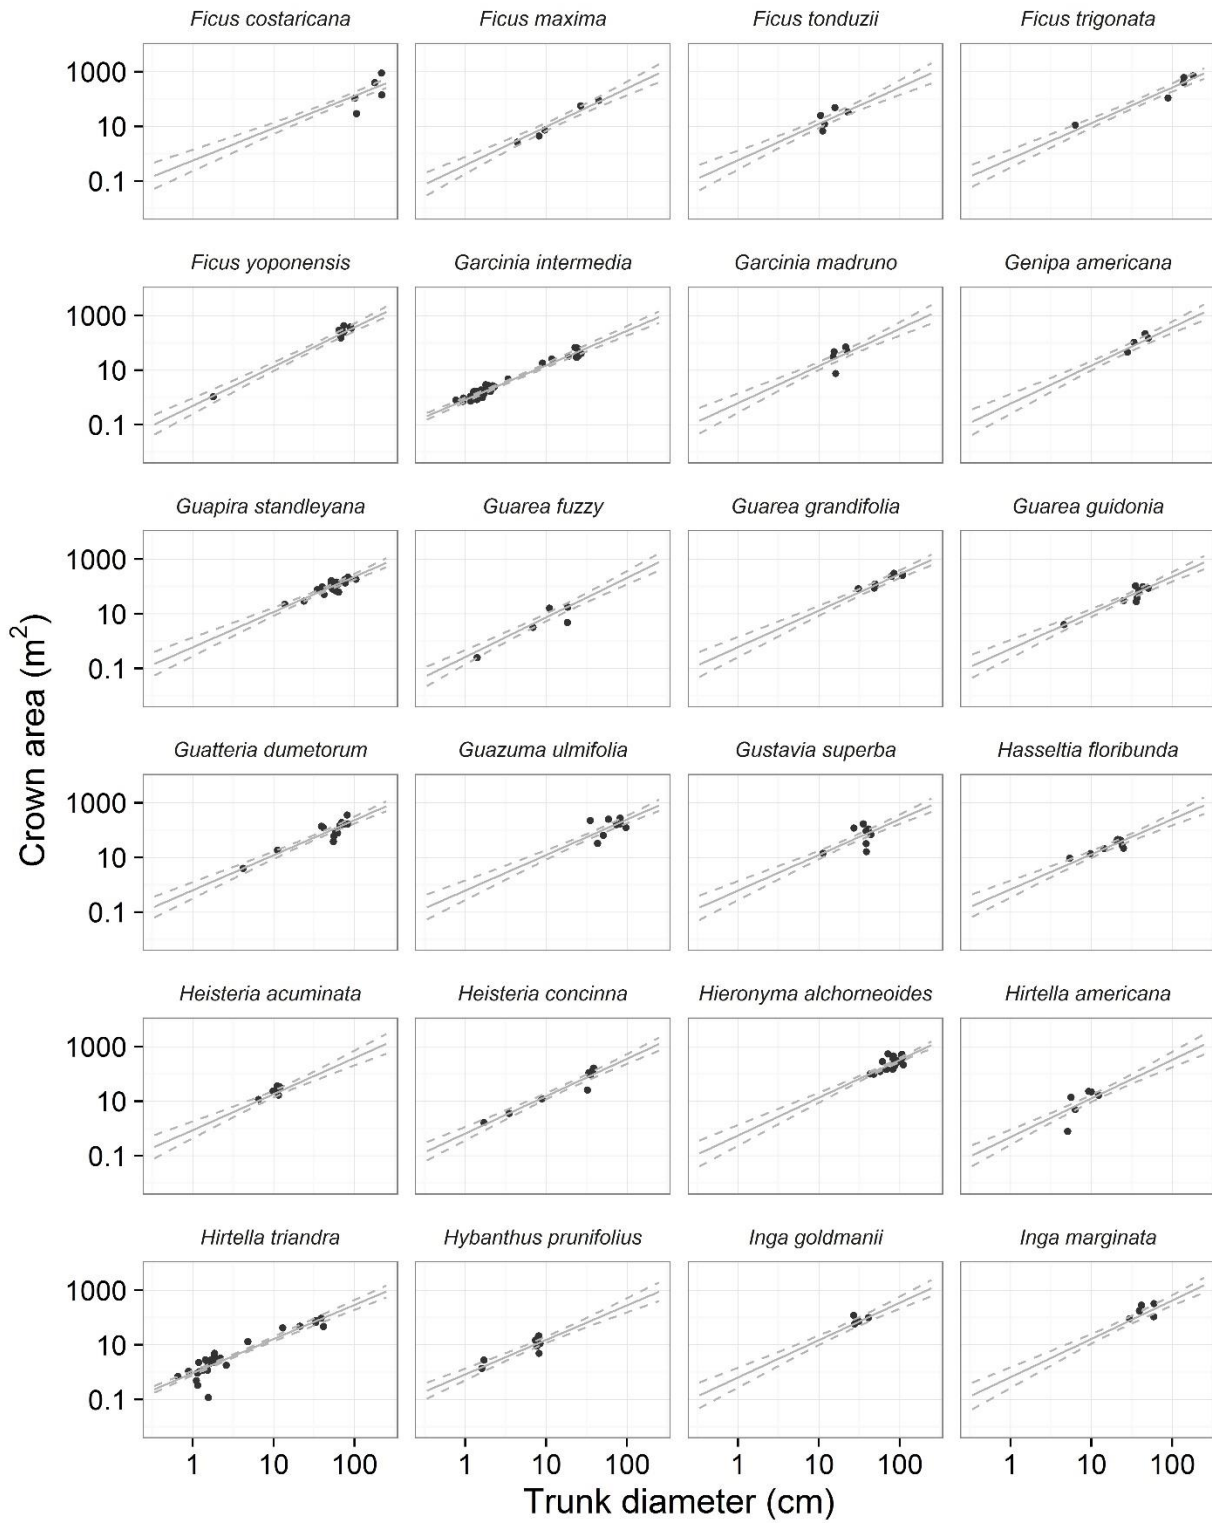

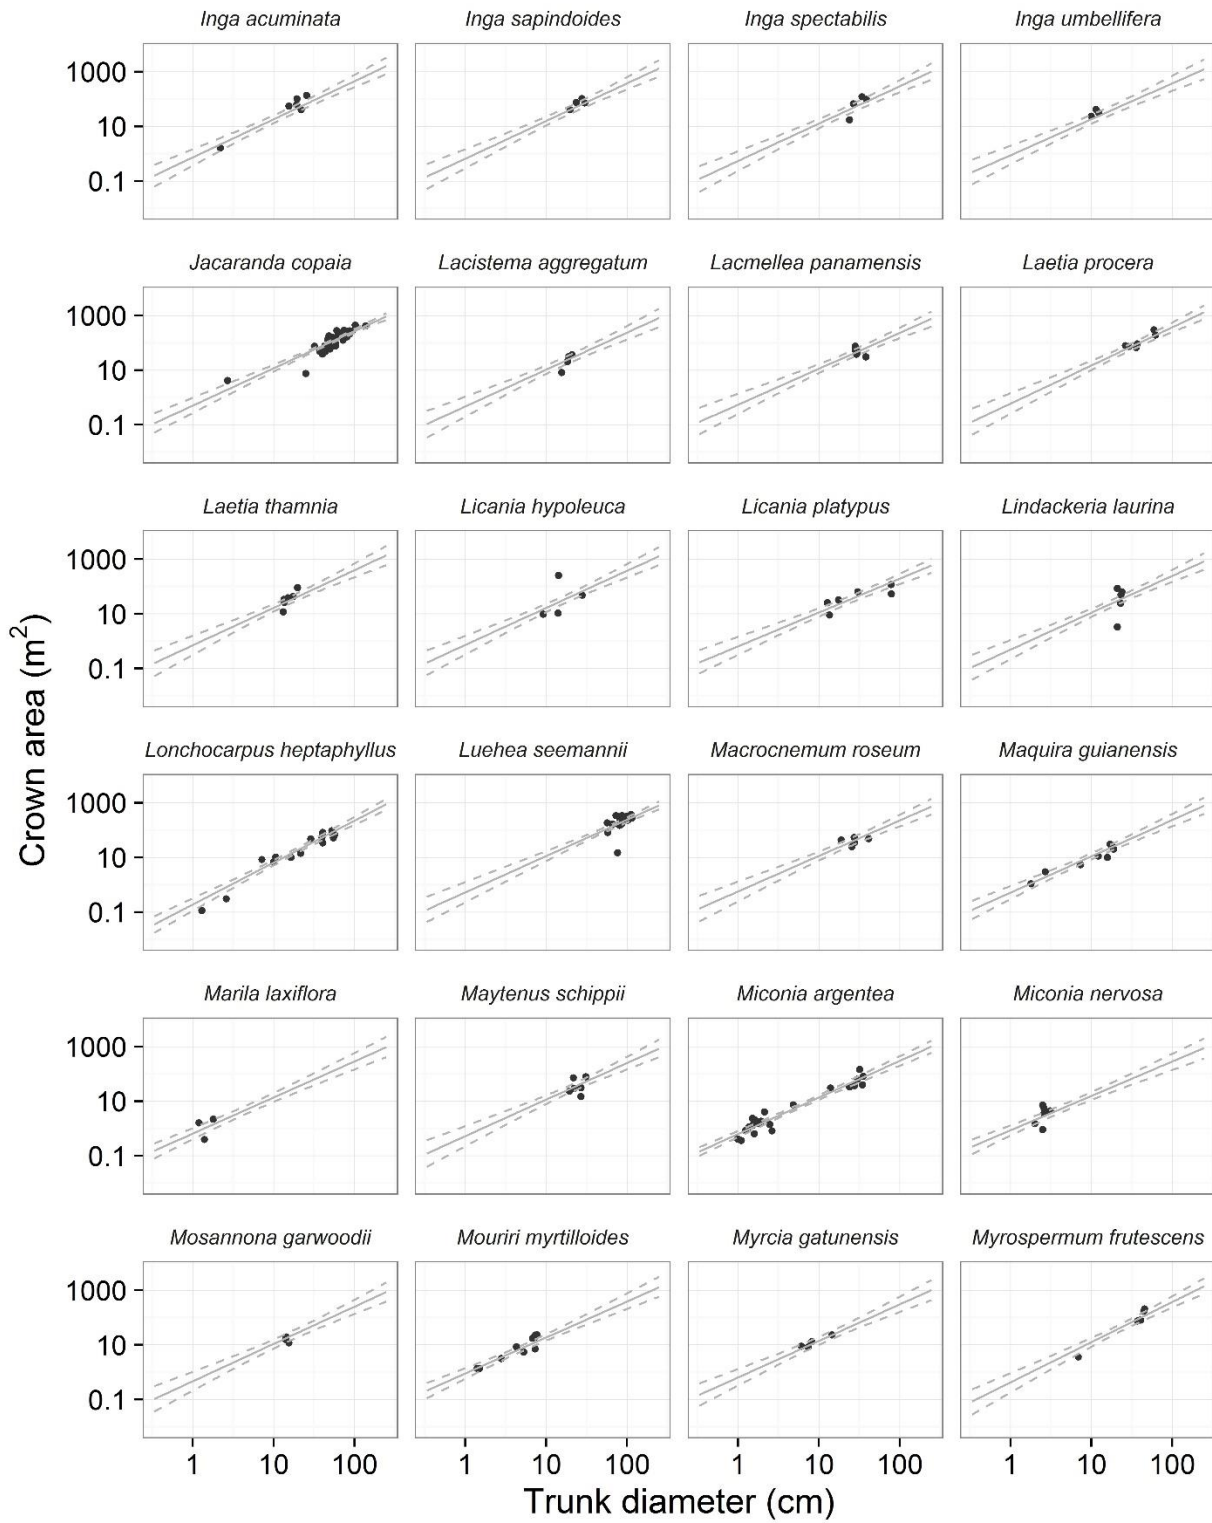



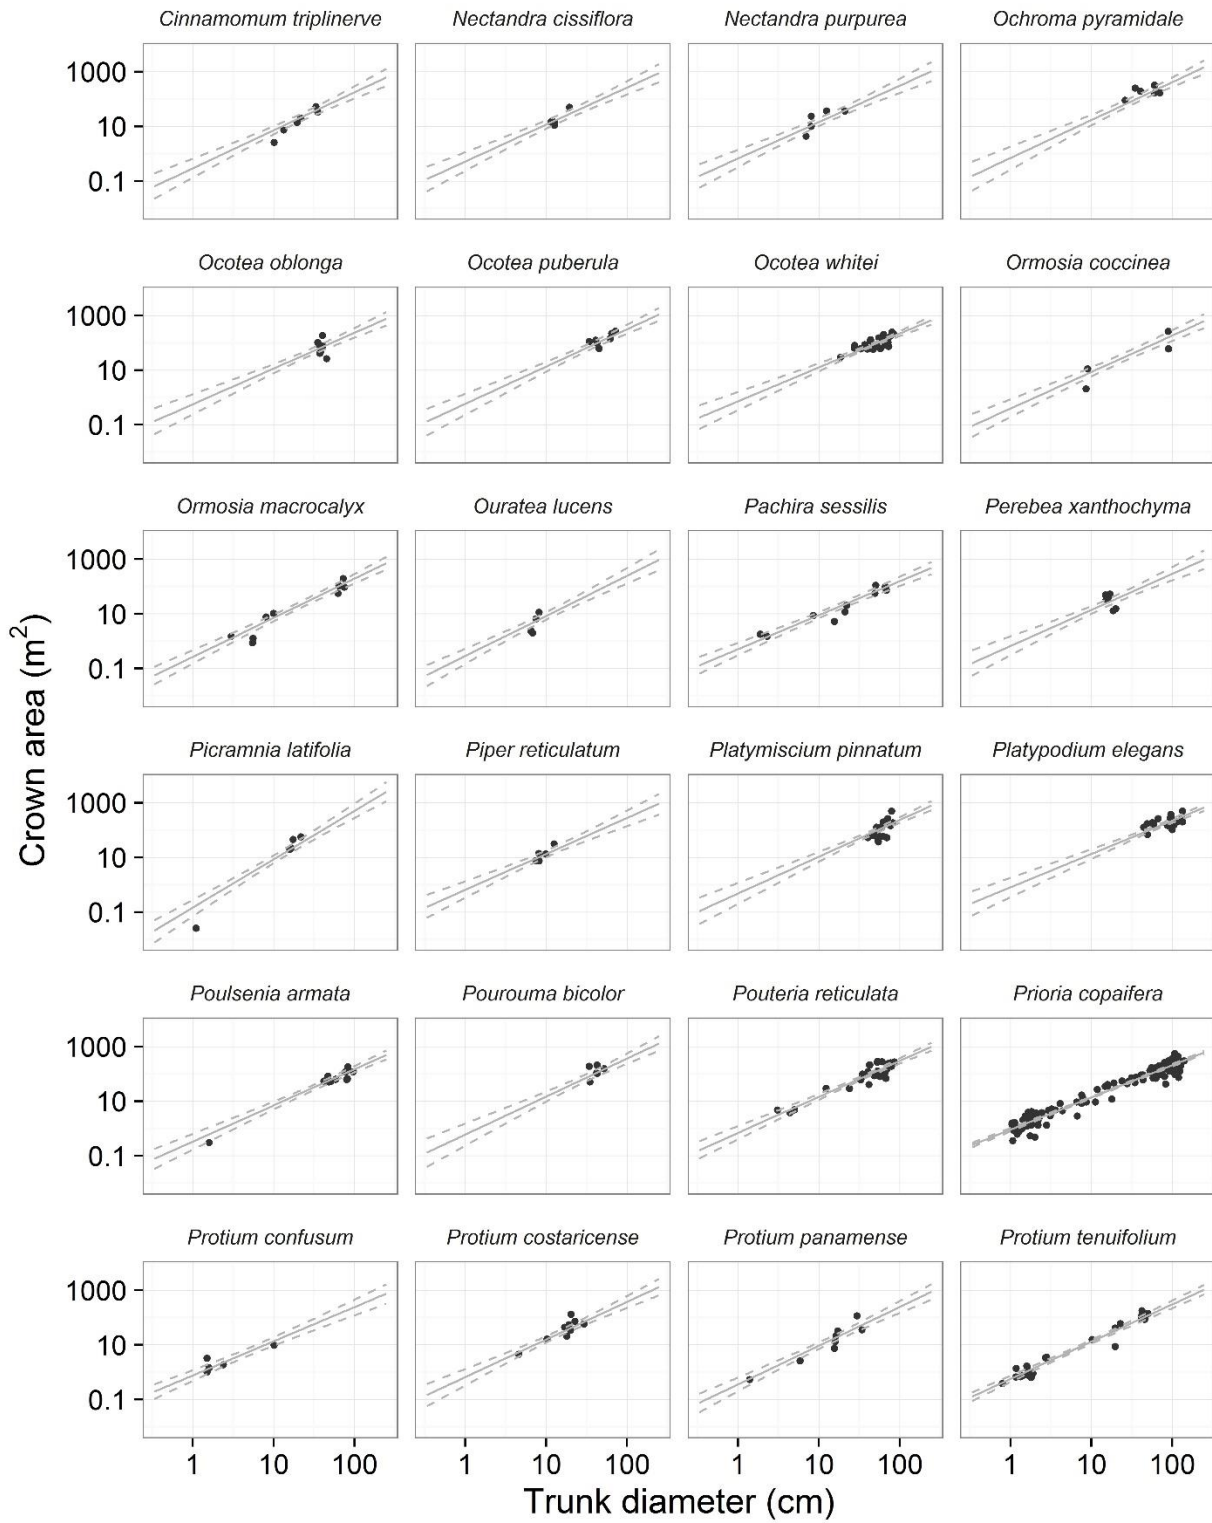

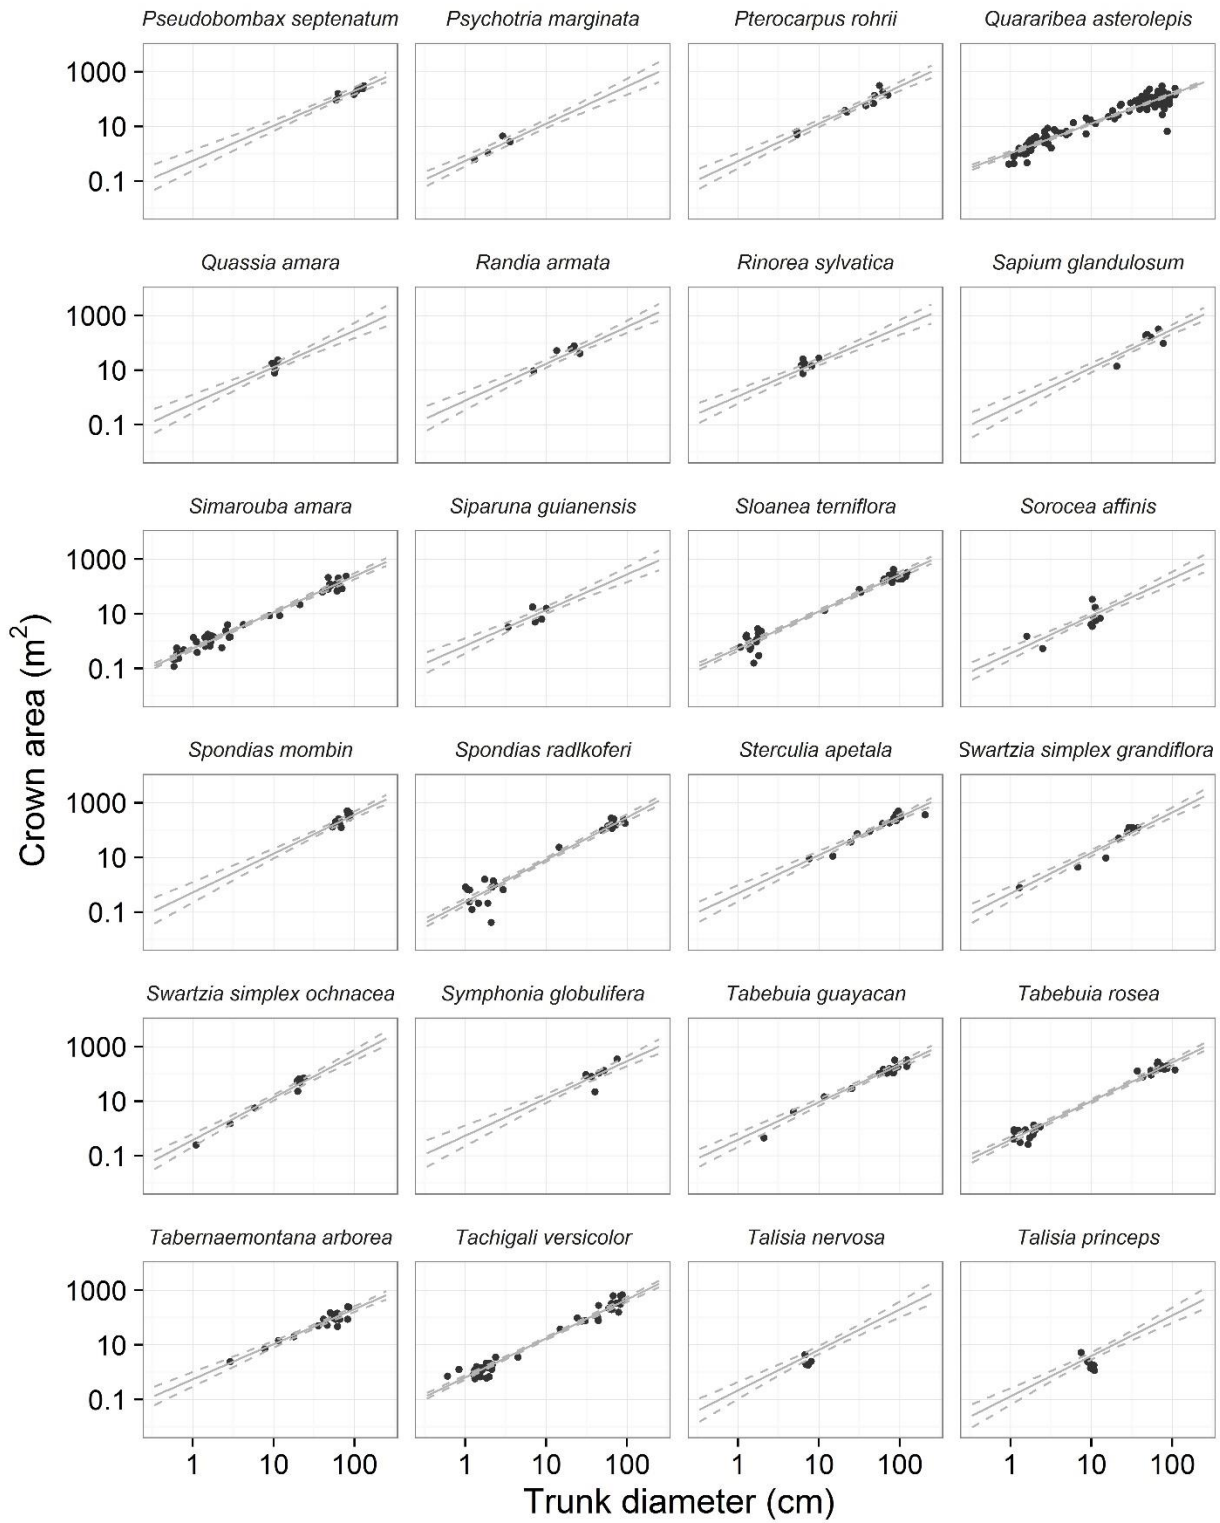

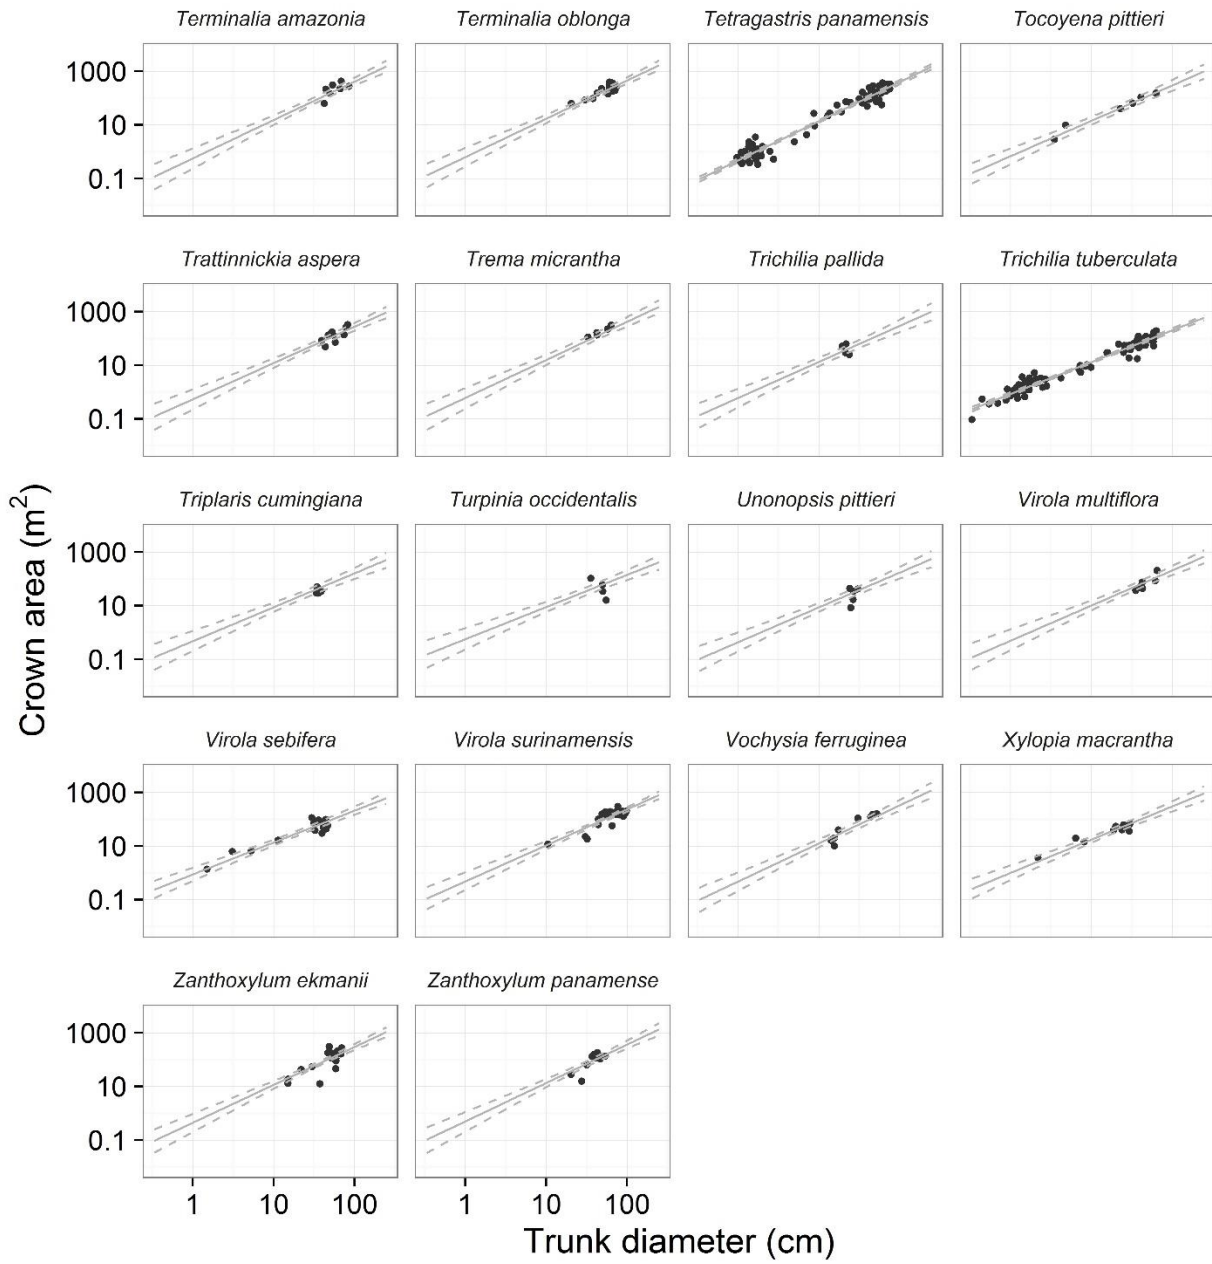

## Appendix S2: Stan code

### Power function model

```
// Linear mixed model with varying parameters among species and one group level covariate
// for a power function allometric model
data {
  int< lower=0 > N; // number of samples
  int< lower=0 > Ng; // number of groups
  int< lower=0 > p; // number of parameters

  vector[ N ] y; // dependent variable: natural logarithm of tree height or crown area
  vector[ N ] x; // independent variable: natural logarithm of trunk diameter
  int g[ N ]; // species indicator
  real xbar; // mean of x

  vector[ Ng ] z; // covariate
  real zbar; real zs; // mean and standard deviation of the covariate z across species
}
transformed data{
  vector[ Ng ] zc; // centered and scaled covariate
  for ( i in 1 : Ng )
  {
    zc[ i ] = ( z[ i ] - zbar ) / zs;
  }
}
parameters {
  // species parameters of the allometric model:
  //   log a and b for the power function
  //   log a, b and k for the rescaled Weibull and the generalized Michaelis Menten
  vector[ p ] beta[ Ng ];
  vector[ p ] mu; // community level means (means of parameters across species)
  vector[ p ] theta; // community level effects of the covariate 'z' on each parameter
  // across species parameter variances
  real< lower=0 > sigmaa;
  real< lower=0 > sigmab;
  // standard deviation for observation error
  real< lower=0 > serror;
}
transformed parameters {
  vector[ N ] y_hat; // predicted mean for each y

  for ( n in 1 : N )
  {
    // power function
    y_hat[ n ] = beta[ g[ n ], 1 ] + beta[ g[ n ], 2 ] * ( x[ n ] - xbar );
  }
}
model {
  // prior distribution for community level covariate effects
  theta[ 1 ] ~ normal( 0, 100 ); theta[ 2 ] ~ normal( 0, 100 );

  // prior distribution for the parameters of the regression predicting population level
  parameters
  mu[ 1 ] ~ normal( 0, 100 ); mu[ 2 ] ~ normal( 0, 100 );

  // community level parameters act as priors of species level parameters
  for ( i in 1 : Ng )
  {
    beta[ i, 1 ] ~ normal( mu[ 1 ] + theta[ 1 ] * zc[ i ], sigmaa ); // prior for group level
    parameter log a
  }
}
```

```
    beta[ i, 2 ] ~ normal( mu[ 2 ] + theta[ 2 ] * zc[ i ], sigmab ); // prior for group level
parameter b
}

// data model
y ~ normal( y_hat, serror );
}
generated quantities {
  // pointwise log-likelihoods for WAIC estimation
  vector[ N ] log_lik;
  for ( n in 1 : N )
  {
    log_lik[ n ] = normal_lpdf( y[ n ] | y_hat[ n ], serror );
  }
}
```

## Generalized Michaelis-Menten model

```
// Nonlinear mixed model with varying parameters among species and one group level covariate
// for a generalized Michaelis Menten allometric model
data {
  int< lower=0 > N; // number of samples
  int< lower=0 > Ng; // number of groups
  int< lower=0 > p; // number of parameters

  vector[ N ] y; // dependent variable: natural logarithm of tree height or crown area
  vector[ N ] x; // independent variable: natural logarithm of trunk diameter
  int g[ N ]; // species indicator
  real xbar; // mean of x

  vector[ Ng ] z; // covariate
  real zbar; real zs; // mean and standard deviation of the covariate z across species
}
transformed data{
  vector[ Ng ] zc; // centered and scaled covariate
  for ( i in 1 : Ng )
  {
    zc[ i ] = ( z[ i ] - zbar ) / zs;
  }
}
parameters {
  // species parameters of the allometric model:
  // a and b for the power function
  // log a, b and k for the rescaled Weibull and the generalized Michaelis Menten
  vector[ p ] beta[ Ng ];
  vector[ p ] mu; // community level means (means of parameters across species)
  vector[ p ] theta; // community level effects of the covariate 'z' on each parameter
  // across species parameter variances
  real< lower=0 > sigmaa;
  real< lower=0 > sigmab;
  real< lower=0 > sigmak;
  // standard deviation for observation error
  real< lower=0 > serror;
}
transformed parameters {
  vector[ N ] y_hat; // predicted mean for each y

  for ( n in 1 : N )
  {
    // generalized Michaelis Menten
    y_hat[ n ] = beta[ g[ n ], 1 ] + beta[ g[ n ], 2 ] * log( x[ n ] ) - log( beta[ g[ n ], 3 ]
) + pow( x[ n ], beta[ g[ n ], 2 ] );
  }
}
model {
  // prior distribution for community level covariate effects
  theta[ 1 ] ~ normal( 0, 100 ); theta[ 2 ] ~ normal( 0, 100 ); theta[ 3 ] ~ normal( 0, 100 );

  // prior distribution for the parameters of the regression predicting population level
parameters
  mu[ 1 ] ~ normal( 0, 100 ); mu[ 2 ] ~ normal( 0, 100 )T[0,]; mu[ 3 ] ~ normal( 0, 100
)T[0,];

  // community level parameters act as priors of species level parameters
  for ( i in 1 : Ng )
  {
    beta[ i, 1 ] ~ normal( mu[ 1 ] + theta[ 1 ] * zc[ i ], sigmaa ); // prior for group level
parameter log a

```

```

    beta[ i, 2 ] ~ normal( mu[ 2 ] + theta[ 2 ] * zc[ i ], sigmab )T[0,]; // prior for group
Level parameter b
    beta[ i, 3 ] ~ normal( mu[ 3 ] + theta[ 3 ] * zc[ i ], sigmak )T[0,]; // prior for group
Level parameter k
  }

  // data model
  y ~ normal( y_hat, serror );
}
generated quantities {
  // pointwise log-likelihoods for WAIC estimation
  vector[ N ] log_lik;
  for ( n in 1 : N )
  {
    log_lik[ n ] = normal_lpdf( y[ n ] | y_hat[ n ], serror );
  }
}

```

## Rescaled Weibull model

```
// Nonlinear mixed model with varying parameters among species and one group level covariate
// for a rescaled Weibull allometric model
data {
  int< lower=0 > N; // number of samples
  int< lower=0 > Ng; // number of groups
  int< lower=0 > p; // number of parameters

  vector[ N ] y; // dependent variable: natural logarithm of tree height or crown area
  vector[ N ] x; // independent variable: natural logarithm of trunk diameter
  int g[ N ]; // species indicator
  real xbar; // mean of x

  vector[ Ng ] z; // covariate
  real zbar; real zs; // mean and standard deviation of the covariate z across species
}
transformed data{
  vector[ Ng ] zc; // centered and scaled covariate
  for ( i in 1 : Ng )
  {
    zc[ i ] = ( z[ i ] - zbar ) / zs;
  }
}
parameters {
  // species parameters of the allometric model:
  // a and b for the power function
  // log a, b and k for the rescaled Weibull and the generalized Michaelis Menten
  vector[ p ] beta[ Ng ];
  vector< lower=0 >[ p ] mu; // community level means (means of parameters across species)
  vector[ p ] theta; // community level effects of the covariate 'z' on each parameter
  // across species parameter variances
  real< lower=0 > sigmaa;
  real< lower=0 > sigmab;
  real< lower=0 > sigmak;
  // standard deviation for observation error
  real< lower=0 > serror;
}
transformed parameters {
  vector[ N ] y_hat; // predicted mean for each y

  for ( n in 1 : N )
  {
    // rescaled Weibull
    //y_hat[ n ] = log( beta[ g[ n ], 1 ] * ( 1.0 - exp( - beta[ g[ n ], 2 ] * pow( x[ n ],
    beta[ g[ n ], 3 ] ) ) ) );
    // improve numerical scatability??: http://mc-stan.org/misc/warnings.html#exception-
    hamiltonian-proposal-rejected
    y_hat[ n ] = log( beta[ g[ n ], 1 ] ) + log1m_exp( - beta[ g[ n ], 2 ] * pow( x[ n ],
    beta[ g[ n ], 3 ] ) );
  }
}
model {
  // prior distribution for community level covariate effects
  theta[ 1 ] ~ normal( 0, 100 ); theta[ 2 ] ~ normal( 0, 100 ); theta[ 3 ] ~ normal( 0, 100 );

  // prior distribution for the parameters of the regression predicting population level
  parameters
  mu[ 1 ] ~ normal( 0, 100 )T[0,]; mu[ 2 ] ~ normal( 0, 100 )T[0,]; mu[ 3 ] ~ normal( 0, 100
  )T[0,];

  // community level parameters act as priors of species level parameters
  for ( i in 1 : Ng )
```



```

{
  beta[ i, 1 ] ~ normal( mu[ 1 ] + theta[ 1 ] * zc[ i ], sigmaa )T[0,]; // prior for group
Level parameter a
  beta[ i, 2 ] ~ normal( mu[ 2 ] + theta[ 2 ] * zc[ i ], sigmab )T[0,]; // prior for group
Level parameter b
  beta[ i, 3 ] ~ normal( mu[ 3 ] + theta[ 3 ] * zc[ i ], sigmak )T[0,]; // prior for group
Level parameter k
}

// data model
y ~ normal( y_hat, serror );
}
generated quantities {
  // pointwise log-likelihoods for WAIC estimation
  vector[ N ] log_lik;
  for ( n in 1 : N )
  {
    log_lik[ n ] = normal_lpdf( y[ n ] | y_hat[ n ], serror );
  }
}

```
